# Supplementary material for: The quantitative pyrrole protection of l-phenylalanine/l-phenylalaninol in aqueous media and rationally updating the mechanisms of the Clauson-Kaas reaction through DFT study
Source: Royal Society of Chemistry journal article supplement (doi:10.1039/d3ra06595b), 2023-01-01
Supplement: d3ra06595b1.pdf [file d3ra06595b1.pdf]

## *Electronic Supplementary Information for*

# **The Quantitative Pyrrole Protection of L-Phenylalanine/ L-Phenylalaninol in Aqueous Media and Rationally Updating Mechanisms of Clauson-Kaas Reaction through DFT Study**

Yuan Qin,<sup>#a</sup> Pei Cao,<sup>#a</sup> Virinder S. Parmar,<sup>b,c</sup> Yonghong Liu,<sup>a</sup> Chenghai Gao <sup>\*a</sup> and Kai Liu <sup>\*a</sup>

<sup>a</sup> Guangxi Key Laboratory of Marine Drugs/Institute of Marine Drugs, Guangxi University of Chinese Medicine, Nanning 530200, PR China.

<sup>b</sup> Nanoscience Program, CUNY Graduate Center and Department of Chemistry and Environmental Science, Medgar Evers College, The City University of New York, 1638 Bedford Avenue, New York, NY 11225, USA.

<sup>c</sup> Amity Institute of Click Chemistry and Research Studies, Amity University, Uttar Pradesh, Sector 125, Noida 201313, India.

# Y. Qin and P. Cao contributed equally to this work.

\* Corresponding author. E-mails: gaoch@gxtcmu.edu.cn (C. Gao), kailiu@outlook.com (K. Liu).

| <b>Index</b>                                                                                       | <b>Page No.</b> |
|----------------------------------------------------------------------------------------------------|-----------------|
| <b>Experimental part</b>                                                                           | S3              |
| General information                                                                                | S3              |
| NMR Spectrum                                                                                       | S3              |
| Apparatus                                                                                          | S3              |
| Chromatography                                                                                     | S3              |
| Reagent and Solvent                                                                                | S3              |
| Standard procedure for the Clauson-Kaas reaction of L-Phenylalanine                                | S3              |
| Preparation of aqueous succinaldehyde solution                                                     | S4              |
| Standard procedure for the Paal-Knorr reaction of L-Phenylalaninol                                 | S4              |
| Key characterization data for compounds <b>19</b> and <b>20</b>                                    | S4              |
| Fig. S1. Optimized Paal-Knorr procedures of L-Phenylalanine/L-Phenylalaninol                       | S5              |
| Table S1. Summary of reacting conditions and crude weights/corresponding yields                    | S5              |
| Fig. S1'. Test of Clauson-Kaas procedure for ester <b>21</b> with DMTHF in H <sub>2</sub> O        | S6              |
| Clauson-Kaas reaction parameters for ester <b>21</b> with DMTHF in aqueous media                   | S6              |
| The assignment of NMR signals for reactants mixture of Clauson-Kaas reactions                      | S6              |
| Fig. S1". Test of Paal-Knorr procedure for ester <b>21</b> with succinaldehyde in H <sub>2</sub> O | S7              |

|                                                                                                         |     |
|---------------------------------------------------------------------------------------------------------|-----|
| Paal–Knorr reaction parameters for ester <b>21</b> with succinaldehyde in aqueous media                 | S7  |
| The assignment of NMR signals for reactants mixture of Paal–Knorr reaction                              | S7  |
| <b>Computational study</b>                                                                              | S8  |
| General detail                                                                                          | S8  |
| Fig. S2. Energy profile of reaction pathway                                                             | S8  |
| Fig. S3. Comparison of energy barriers of initiating SN <sub>2</sub> step for TS1', TS1" & TS1          | S9  |
| Fig. S4. Comparison of energy barriers of initial SN <sub>2</sub> step between acid and ester           | S9  |
| Cartesian coordinates and energies of TS1                                                               | S10 |
| Cartesian coordinates and energies of TS2                                                               | S11 |
| Cartesian coordinates and energies of TS3                                                               | S12 |
| Cartesian coordinates and energies of TS4                                                               | S13 |
| Cartesian coordinates and energies of TS5                                                               | S14 |
| Cartesian coordinates and energies of TS6                                                               | S14 |
| Cartesian coordinates and energies of TS1'                                                              | S15 |
| Cartesian coordinates and energies of TS1"                                                              | S16 |
| Cartesian coordinates and energies of TS7                                                               | S17 |
| Cartesian coordinates and energies of TS7'                                                              | S19 |
| <b>References</b>                                                                                       | S20 |
| <b>Copies of the NMR spectra</b>                                                                        | S21 |
| DMTHF, 10% CA, 90 °C, 2 h for <sup>1</sup> H NMR of purified Compound <b>19</b>                         | S21 |
| DMTHF, 0.75% CA, u-crude vs 10% CA, d-purified, 90 °C, 2 h, <sup>13</sup> C NMR- <b>19</b>              | S21 |
| DMTHF, 0.75% CA, 90 °C, 1 h for crude <sup>1</sup> H & <sup>13</sup> C NMR of Compound <b>19</b>        | S22 |
| DMTHF, 0.75% CA, 90 °C, 30 min for crude <sup>1</sup> H & <sup>13</sup> C NMR of Compound <b>19</b>     | S23 |
| DMTHF, 0.75% CA, 90 °C, 15 min for crude <sup>1</sup> H & <sup>13</sup> C NMR of Compound <b>19</b>     | S24 |
| DMTHF, 0.3% CA, 90 °C, 30 min for crude <sup>1</sup> H & <sup>13</sup> C NMR of Compound <b>19</b>      | S25 |
| DMTHF, 0.1% CA, 90 °C, 30 min for crude <sup>1</sup> H & <sup>13</sup> C NMR of Compound <b>19</b>      | S26 |
| DMTHF, 0.05% CA, 90 °C, 30 min for crude <sup>1</sup> H & <sup>13</sup> C NMR of Compound <b>19</b>     | S27 |
| DMTHF, 0.01% CA, 90 °C, 30 min for crude <sup>1</sup> H & <sup>13</sup> C NMR of Compound <b>19</b>     | S28 |
| DMTHF, 0% CA, 90 °C, 30 min for crude <sup>1</sup> H & <sup>13</sup> C NMR of Compound <b>19</b>        | S29 |
| DMTHF, 0% CA, 90 °C, 15 min for crude <sup>1</sup> H & <sup>13</sup> C NMR of Compound <b>19</b>        | S30 |
| Fig. S5. Crude parallel <sup>1</sup> H NMR for the N-protected products of L-Phenylalanine              | S31 |
| DMTHF, 0% CA, 100 °C, 2 h for <sup>1</sup> H & <sup>13</sup> C NMR of crude reactants from <b>18</b>    | S32 |
| Succinaldehyde, 0% CA, 100 °C, 4 h for crude <sup>1</sup> H & <sup>13</sup> C NMR of Compound <b>20</b> | S33 |
| DMTHF, 0% CA, 90 °C, 30 min for crude <sup>1</sup> H & <sup>13</sup> C NMR of Compound <b>21</b>        | S34 |
| DMTHF, 0.75% CA, 90 °C, 30 min for crude <sup>1</sup> H & <sup>13</sup> C NMR of Compound <b>21</b>     | S35 |
| DMTHF, 10% CA, 90 °C, 2 h for crude <sup>1</sup> H & <sup>13</sup> C NMR of Compound <b>21</b>          | S36 |
| Succinaldehyde, 0% CA, rt, 10 h for crude <sup>1</sup> H & <sup>13</sup> C NMR of Compound <b>21</b>    | S37 |

## Experimental part

### General information

#### NMR Spectrum:

<sup>1</sup>H and <sup>13</sup>C spectra were collected on 500 MHz NMR spectrometer (Bruker AVANCE). Chemical shifts for protons are reported in parts per million (ppm) downfield and are referenced to residual protium in the NMR solvent (CHCl<sub>3</sub> = δ 7.26, D<sub>2</sub>O = δ 4.79). Chemical for carbon are reported in parts per million downfield and are referenced to the carbon resonances of solvent (CHCl<sub>3</sub> = δ 77.16). Data are represented as follows: chemical shift, multiplicity (br = broad, s = singlet, d = double, t = triplet, q = quartet, m = multiplet, quintet using full name), coupling constants in Hertz (Hz), integration.

#### Apparatus:

UPH-II-20TN Ultrapure Water System, Sichuan ULUPURE Ultrapure Technology Co., Ltd. Semi-Micro Balance Precisa EP 225SM-DR, Switzerland. Himac CT15E Tabletop High-Speed Micro Centrifuges, Japan. IKA C-MAG HS 7 Control Magnetic Heating Stirrer, Germany. QiWei WFH-203B Camera obscura UV analyzer, China.

#### Chromatography:

Flash chromatography was conducted in glass columns using Qingdao Haiyang Chemical Co., Ltd. silica gel (160-200 mesh, Shandong, China). Analytical thin layer chromatography (TLC) was performed on precoated silica gel GF254 HPTLC plates (5 × 10 cm<sup>2</sup>) purchased from Yantai Jiangyou Chemical Co., Ltd. (Shandong, China). The developed chromatogram was analyzed by UV lamp (254 and 365 nm). The non-UV active compounds were generally visualized through placing the plates in a sealed TLC tank containing iodine and silica gel (the 160-200 mesh mentioned above), if necessary, at the aid of a heating gun. The progress of reaction was also monitored by TLC stained with 5% v/v ethanol aqueous solution of concentrated H<sub>2</sub>SO<sub>4</sub> and estimated in a concentration and time dependent manner.

#### Reagent and Solvent:

L-Phenylalanine (99%) was provided by Shanghai Adamas Technology Co., Ltd. 2,5-dimethoxytetrahydrofuran (DMTHF, 98%), L-Phenylalaninol (97%) were supplied by Shanghai Bidepharm. Acetic acid (AR) was obtained from Xilong Scientific Co., Ltd. Citric acid monohydrate (AR), Potassium acetate (AR), Sodium bicarbonate (AR) were purchased from Guangdong Guanghua Sci-Tech Co., Ltd. Dichloroethane (DCE, 99%), Amberlite 732 (AR) were supplied by Shanghai Macklin Biochemical Technology Co., Ltd. (S)-Methyl 2-amino-3-phenylpropanoate (97%) was bought from the Shanghai Acme Biochemical Co., Ltd. Chloroform (AR) was offered by Sinopharm Chemical Reagent Co., Ltd.

#### Standard procedure for the Clauson-Kaas reaction of L-Phenylalanine.

A 5 mL reaction vial bearing sealed cup was charged with a magnetic stir bar, L-Phenylalanine (16.5 mg, 0.1 mol, 1.0 equivalent) followed by ultrapure water (300 μL, about 20 volumes), to which, 2,5-dimethoxytetrahydrofuran (DMTHF, 13.9 mg, 13.0 μl, 1.05 equivalents) was added via a micro pipette tip. The reaction vessel was sealed and heated for appropriate time at 90 °C monitored by the TLC. After the reaction (0.1 mmol scale) was finished, the aiming products were separated as oily deposition by convenient centrifugation at the speed of 8000 rpm for 5 min. The common organic solvents including EtOAc or CHCl<sub>3</sub> could be chosen to dissolve the remaining slurry, which could be washed by proper amount of water successively. Finally, the organic phase was dried over Na<sub>2</sub>SO<sub>4</sub> and evaporated by vacuo pump (or air-dried) delivering targeting pyrrolyl compounds with nearly quantitative yield and perfect purity certified by crude NMR.

### Preparation of aqueous succinaldehyde solution.

To a stirred solution of 2,5-dimethoxytetrahydrofuran (DMTHF, 1.0 g, 37.8 mmol) in H<sub>2</sub>O (2.5 mL) was added Amberlyst-732 (10 wt%) and further heated at 70 °C for 4 h in an open flask and allow the MeOH evaporate. The resulting solution was cooled to room temperature and used directly after filtration the catalytic resins. The solutions have a value of pH about 7.0 (neutral).

### Standard procedure for the Paal–Knorr reaction of L-Phenylalaninol.

A 5 mL reaction vial bearing sealed cup was charged with a magnetic stir bar, L-Phenylalaninol (13.7 mg, 0.1 mol, 1.0 equivalent) followed by ultrapure water (300 μL, about 20 volumes), to which, succinaldehyde (0.11mol, 1.1 equivalents) was added via a micro pipette tip. The reaction vessel was sealed and heated for appropriate time at 100 °C monitored by the TLC. After the reaction (0.1 mmol scale) was finished, the aiming products were separated as oily deposition by convenient centrifugation at the speed of 8000 rpm for 5 min. The common organic solvents including EtOAc or CHCl<sub>3</sub> could be chosen to dissolve the remaining slurry, which could be washed by proper amount of water successively. Finally, the organic phase was dried over Na<sub>2</sub>SO<sub>4</sub> and evaporated by vacuo pump (or air-dried) delivering targeting pyrrolyl compounds with nearly quantitative yield and perfect purity certified by crude NMR.

### Key characterization data for compounds 19 and 20.

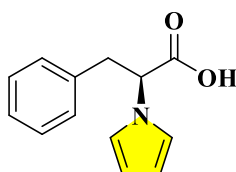

19

**(S)-3-phenyl-2-(1H-pyrrol-1-yl)propanoic acid (Compound 19)** (DMTHF, 0% CA, 90 °C, 30 min)

<sup>1</sup>H NMR (500 MHz, CDCl<sub>3</sub>) δ<sub>H</sub> 7.25 – 7.21 (m, 3H), 7.02 (dd, *J* = 7.6, 1.9 Hz, 2H), 6.70 (t, *J* = 2.1 Hz, 2H), 6.16 (t, *J* = 2.1 Hz, 2H), 4.78 (dd, *J* = 9.3, 5.8 Hz, 1H), 3.45 (dd, *J* = 14.0, 5.8 Hz, 1H), 3.29 (dd, *J* = 14.0, 9.4 Hz, 1H).

<sup>13</sup>C NMR (126 MHz, CDCl<sub>3</sub>) δ<sub>C</sub> 175.21, 136.27, 128.92, 128.73, 127.25, 120.36, 109.00, 63.53, 39.15.

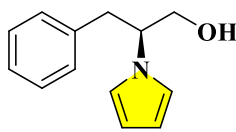

20

**(S)-3-phenyl-2-(1H-pyrrol-1-yl)propan-1-ol (Compound 20)** (Succinaldehyde, 0% CA, 100 °C, 4 h)

<sup>1</sup>H NMR (500 MHz, CDCl<sub>3</sub>) δ<sub>H</sub> 7.27 – 7.19 (m, 3H), 7.04 (d, *J* = 7.0 Hz, 2H), 6.70 (t, *J* = 2.2 Hz, 2H), 6.17 (t, *J* = 2.1 Hz, 2H), 4.19 (quintet, *J* = 6.2 Hz, 1H), 3.81 (d, *J* = 5.9 Hz, 2H), 3.06 (dd, *J* = 7.3, 3.6 Hz, 2H).

<sup>13</sup>C NMR (126 MHz, CDCl<sub>3</sub>) δ<sub>C</sub> 137.72, 128.98, 128.64, 126.79, 119.36, 108.54, 65.41, 63.64, 38.71.

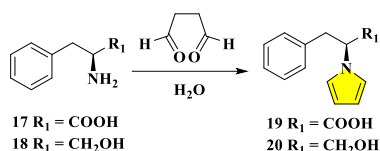

**Fig. S1.** Optimized Paal–Knorr procedures of L-Phenylalanine/L-Phenylalaninol with succinaldehyde in aqueous media.

When L-Phenylalaninol was tested as starting reagent, the condensation with DMTHF was inefficient perhaps due to its basicity.<sup>S1</sup> Even after being heated at 100 °C over 2 h in pure D<sub>2</sub>O, the cooling mixture displayed the intact signals of starting reactants including both L-Phenylalaninol and DMTHF. This comparison of catalytic efficiency in consideration of the structural difference gives an inkling of possibly autocatalytic induction, within the architecture of L-Phenylalanine.

Because we did not detect the presence of succinaldehyde/dihydroxytetrahydrofuran as dialdehyde synthetic equivalents throughout the above reactions with DMTHF, the Paal-Knorr type of cyclization was further checked using succinaldehyde.<sup>S2</sup> The L-Phenylalanine could furnish the pyrroline ring even in room temperature overnight with only minute decrease of yield (83%), while the pyrrole protection on L-Phenylalaninol needed 4 h at 100 °C to achieve the full conversion. All the experimental phenomena prompted us to hypothesize the amino acid could probably play a much important role as a self-stimulated moiety in such systems, and envisage the possible auto-tandem process at the initiating stage (Fig. S1).

**Table S1.** Summary of reacting conditions and crude weights along with corresponding yields.

| Chiral amine                   | $\gamma$ -dicarbonyl or surrogate                | Entry  | Cat. Citric acid | T (°C) | time   | Crude wt. | Crude yield |
|--------------------------------|--------------------------------------------------|--------|------------------|--------|--------|-----------|-------------|
| L-Phenylalanine<br>(0.1 mmol)  | 2,5-dimethoxytetrahydrofuran<br>(DMTHF, 1.05 eq) |        | 3.75%            | 90     | 2 h    | 20.2 mg   | 94%         |
|                                |                                                  | Ent. 1 | 0.75%            | 90     | 1 h    | 20.3 mg   | 94%         |
|                                |                                                  | Ent. 2 | 0.75%            | 90     | 30 min | 22.1 mg   | 103%        |
|                                |                                                  | Ent. 3 | 0.75%            | 90     | 15 min | 20.1 mg   | 93%         |
|                                |                                                  | Ent. 4 | 0.3%             | 90     | 30 min | 23.0 mg   | 107%        |
|                                |                                                  | Ent. 5 | 0.1%             | 90     | 30 min | 20.5 mg   | 95%         |
|                                |                                                  | Ent. 6 | 0.05%            | 90     | 30 min | 19.9 mg   | 92%         |
|                                |                                                  | Ent. 7 | 0.01%            | 90     | 30 min | 21.4 mg   | 99%         |
|                                |                                                  | Ent. 8 | 0                | 90     | 30 min | 20.3 mg   | 94%         |
|                                |                                                  | Ent. 9 | 0                | 90     | 15 min | 16.6 mg   | 77%         |
| L-Phenylalanine<br>(24.2 mmol) | 2,5-dimethoxytetrahydrofuran<br>(DMTHF, 1.05 eq) |        | 0                | 90     | 1.0 h  | 4750.3 mg | 91%         |
| L-Phenylalanine<br>(0.1 mmol)  | Succinaldehyde<br>(1.05 eq)                      |        | 0                | r.t.   | 16 h   | 17.9 mg   | 83%         |
| L-Phenylalaninol<br>(0.1 mmol) | Succinaldehyde<br>(1.1 eq)                       |        | 0                | 100    | 4 h    | 23.9 mg   | 119%        |

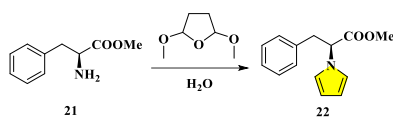

**Fig. S1<sup>1</sup>**. Test of Clauson-Kaas procedure for L-Phenylalanine methyl ester with DMTHF in aqueous media.

**Synthetic method followed the above procedure with DMTHF**

- (1) about 0.1 mmol scale at 90 °C for 30 min with 0% CA in H<sub>2</sub>O, workup by CHCl<sub>3</sub> extraction, NMR in CDCl<sub>3</sub>;
- (2) about 0.1 mmol scale at 90 °C for 30 min with 0.75% CA in H<sub>2</sub>O, workup by CHCl<sub>3</sub> extraction, NMR in CDCl<sub>3</sub>;
- (3) about 0.1 mmol scale at 90 °C for 2 h with 10% CA in D<sub>2</sub>O, real-time NMR in D<sub>2</sub>O directly.

**The assignment of NMR signals for mixtures in the reactants of Clauson-Kaas reaction<sup>S3</sup>**

- (1) 90 °C for 30 min with 0% CA in H<sub>2</sub>O, NMR in CDCl<sub>3</sub>;

**L-Phenylalanine methyl ester (Compound 21)**

<sup>1</sup>H NMR (500 MHz, CDCl<sub>3</sub>) δ 7.32 – 7.18 (m, 5H), 3.73 (dd, *J* = 8.0, 5.2 Hz, 1H), 3.71 (s, 3H), 3.09 (dd, *J* = 13.5, 5.1 Hz, 1H), 2.86 (dd, *J* = 13.5, 7.9 Hz, 2H).

<sup>13</sup>C NMR (126 MHz, CDCl<sub>3</sub>) δ 175.58, 137.30, 129.40, 128.71, 126.98, 55.92, 52.13, 41.17.

**2,5-dimethoxytetrahydrofuran (DMTHF)**

<sup>1</sup>H NMR (500 MHz, CDCl<sub>3</sub>) δ 5.12 – 5.05 (m, 2H), 3.42 (s, 3H), 3.36 (s, 3H), 2.10 – 1.99 (m, 4H).

<sup>13</sup>C NMR (126 MHz, CDCl<sub>3</sub>) δ 106.25, 105.53, 55.47, 55.12, 31.08, 30.16.

- (2) 90 °C for 30 min with 0.75% CA in H<sub>2</sub>O, NMR in CDCl<sub>3</sub>;

**L-Phenylalanine methyl ester (Compound 21)**

<sup>1</sup>H NMR (500 MHz, CDCl<sub>3</sub>) δ 7.32 – 7.18 (m, 5H), 3.73 (dd, *J* = 8.0, 5.1 Hz, 1H), 3.71 (s, 3H), 3.09 (dd, *J* = 13.5, 5.2 Hz, 1H), 2.86 (dd, *J* = 13.5, 7.9 Hz, 2H).

<sup>13</sup>C NMR (126 MHz, CDCl<sub>3</sub>) δ 175.58, 137.30, 129.39, 128.71, 126.98, 55.92, 52.13, 41.18.

**2,5-dimethoxytetrahydrofuran (DMTHF)**

<sup>1</sup>H NMR (500 MHz, CDCl<sub>3</sub>) δ 5.10 – 5.08 (m, 2H), 3.42 (s, 3H), 3.36 (s, 3H), 2.10 – 1.99 (m, 4H).

<sup>13</sup>C NMR (126 MHz, CDCl<sub>3</sub>) δ 106.25, 105.54, 55.47, 55.12, 31.08, 30.17.

- (3) 90 °C for 2 h with 10% CA in D<sub>2</sub>O, real-time NMR in D<sub>2</sub>O.

**L-Phenylalanine methyl ester (Compound 21)**

<sup>1</sup>H NMR (500 MHz, D<sub>2</sub>O) δ 7.37 – 7.22 (m, 5H), 3.91 (dd, *J* = 8.0, 5.2 Hz, 1H), 3.31 (s, 3H), 3.21 (dd, *J* = 14.6, 5.3 Hz, 2H), 3.05 (dd, *J* = 13.5, 7.9 Hz, 2H).

<sup>13</sup>C NMR (126 MHz, D<sub>2</sub>O) δ 173.85, 134.99, 129.19, 128.42, 127.62, 54.78, 48.78, 36.26.

**The protonated L-Phenylalanine methyl ester (Compound 21+H<sup>+</sup>)**

<sup>1</sup>H NMR (500 MHz, D<sub>2</sub>O) δ 7.37 – 7.22 (m, 5H), 4.36 (t, *J* = 6.5 Hz 1H), 3.78 (s, 3H), 3.29-3.15 (m, 2H).

<sup>13</sup>C NMR (126 MHz, D<sub>2</sub>O) δ 170.11, 133.69, 129.29, 128.01, 54.00, 53.43, 35.56.

**2,5-dimethoxytetrahydrofuran (DMTHF)**

<sup>1</sup>H NMR (500 MHz, D<sub>2</sub>O) δ 5.17 – 5.12 (m, 2H), 3.34 (s, 3H), 3.28 (s, 3H), 2.08 – 1.80 (m, 4H).

<sup>13</sup>C NMR (126 MHz, D<sub>2</sub>O) δ 106.11, 105.75, 55.94, 54.95, 30.00, 29.03.

**Citric acid (CA)**

<sup>13</sup>C NMR (126 MHz, D<sub>2</sub>O) δ 180.33, 177.33, 74.47, 44.68.

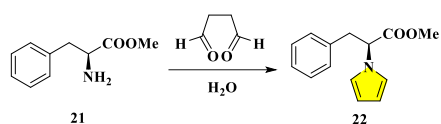

**Fig. S1''.** Test of Paal–Knorr procedure for L-Phenylalanine methyl ester with succinaldehyde in aqueous media.

**Synthetic method followed the above procedure with succinaldehyde**

(4) about 0.1 mmol scale at rt for 10 h with 0% CA in H<sub>2</sub>O, workup by CHCl<sub>3</sub> extraction, NMR in CDCl<sub>3</sub>;  
 (5) about 0.1 mmol scale at 90 °C for 4 h with 0% CA in H<sub>2</sub>O, workup by CHCl<sub>3</sub> extraction, NMR in CDCl<sub>3</sub>.

**The assignment of NMR signals for mixtures in the reactants of Paal–Knorr reaction<sup>S3</sup>**

(4) rt for 10 h with 0% CA in H<sub>2</sub>O, NMR in CDCl<sub>3</sub>.

**L-Phenylalanine methyl ester (about 45%) (Compound 21)**

<sup>1</sup>H NMR (500 MHz, CDCl<sub>3</sub>) δ 7.33 – 7.19 (m, 5H), 3.75 (dd, *J* = 7.9, 5.2 Hz, 1H), 3.72 (s, 3H), 3.10 (dd, *J* = 13.5, 5.2 Hz, 1H), 2.87 (dd, *J* = 13.5, 7.9 Hz, 2H).

<sup>13</sup>C NMR (126 MHz, CDCl<sub>3</sub>) δ 175.52, 137.23, 129.39, 128.72, 126.99, 55.86, 52.14, 41.10.

**Methyl (S)-3-phenyl-2-(1H-pyrrol-1-yl)propanoate (about 55%) (Compound 22)**

<sup>1</sup>H NMR (500 MHz, CDCl<sub>3</sub>) δ 7.33 – 7.17 (m, 3H), 7.06 – 6.99 (m, 2H), 6.72 (t, *J* = 2.2 Hz, 2H), 6.15 (t, *J* = 2.2 Hz, 2H), 4.75 (dd, *J* = 8.9, 6.5 Hz, 1H), 3.70 (s, 3H), 3.42 (dd, *J* = 14.7, 5.7 Hz, 1H), 3.26 (dd, *J* = 13.9, 8.8 Hz, 1H).

<sup>13</sup>C NMR (126 MHz, CDCl<sub>3</sub>) δ 170.75, 136.43, 128.94, 128.67, 127.15, 120.20, 108.81, 63.67, 52.69, 39.58.

## Computational details

### General method

All DFT calculation was performed with the Gaussian 16 (B01) program. Geometry optimization of ground-state was conducted at B3LYP-D3BJ/6-31++G(d,p) with the default polarizable continuum model (PCM) of solvation (solvent = water). Fully optimized geometries of all stationary points were further characterized by frequency calculations in order to verify that the transition states (TSs) had one and only one imaginary frequency for the desired reaction coordinate. The intrinsic reaction coordinate (IRC) analyses using the same level of theory were performed to further ensure that the TS on the potential energy surface connected to the desired minima. Single-point energy calculations were performed at M062X-D3/def2-TZVPP/SMD(water) for all optimized structures. The Gibbs free energies were summed by the single-point energy from M062X and the zero-point correction from B3LYP calculation.

### Energy profile of reaction pathway

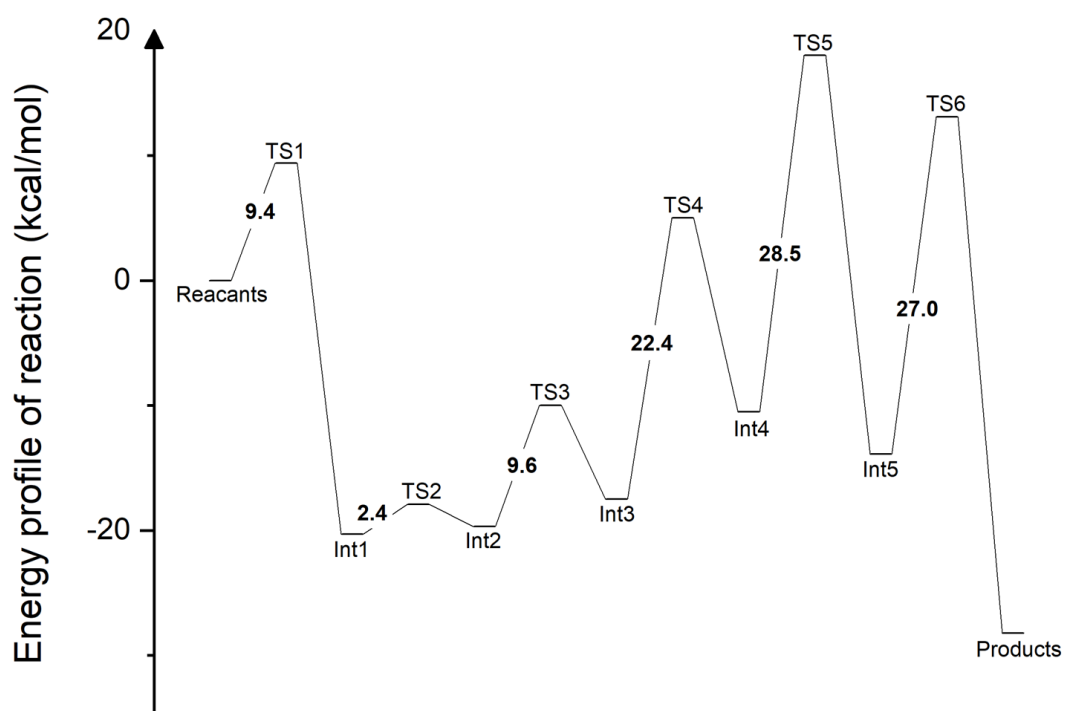

Fig. S2. Energy profile of reaction pathway



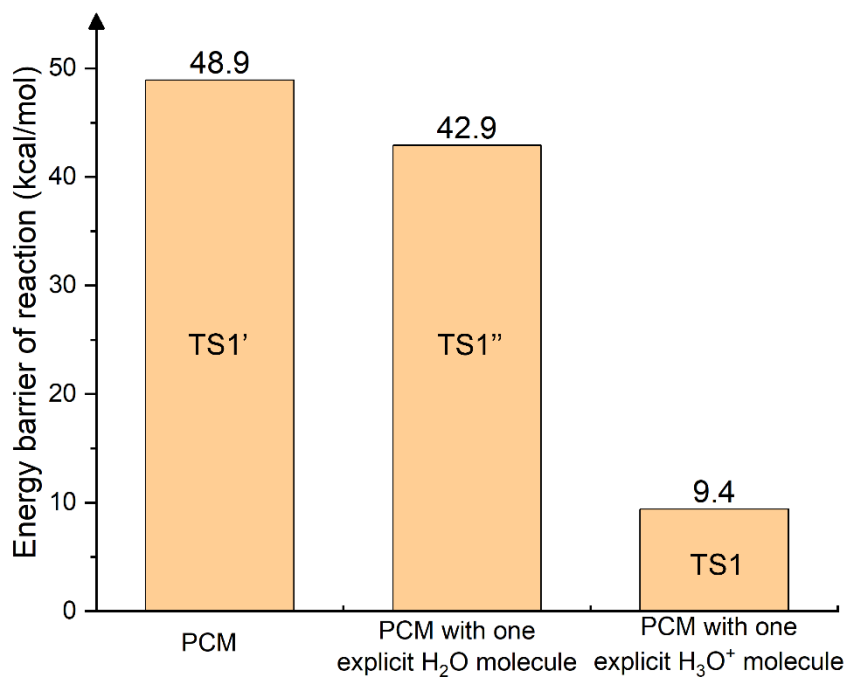

**Fig. S3.** Comparison of energy barriers of initiating SN<sub>2</sub> step for TS1', TS1'' & TS1 (refer to calculations in polarizable continuum model of solvation, PCM; that containing one explicit water molecule solely, PCM+H<sub>2</sub>O; or combined with the weak H<sup>+</sup>, PCM+H<sub>3</sub>O<sup>+</sup>).

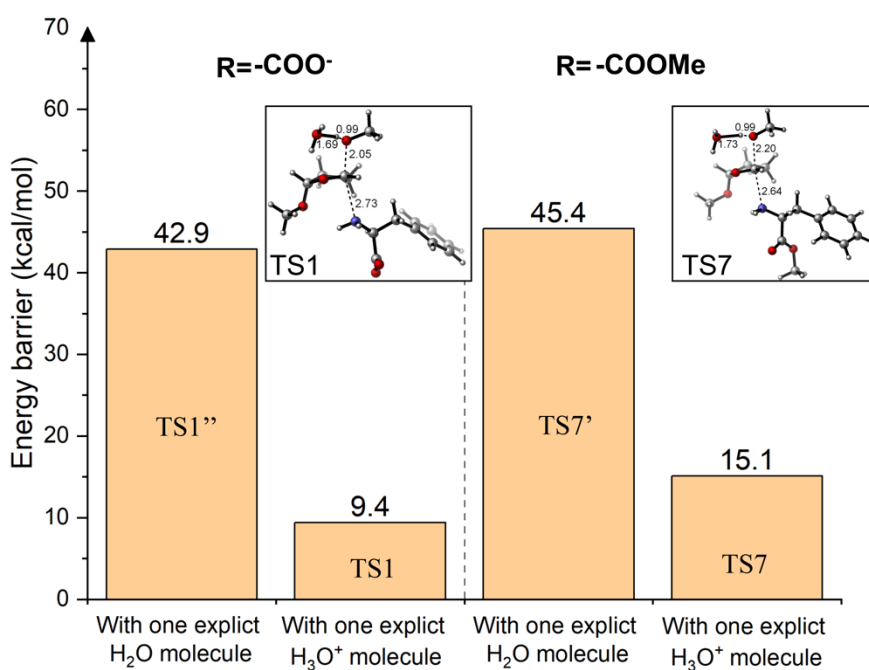

**Fig. S4.** Energy barriers of the first SN<sub>2</sub> reaction step for L-Phenylalanine (R = -COO<sup>-</sup>) and L-Phenylalanine methyl ester (R = -COOMe).

**TS1**Imagine frequency = -157.63 cm<sup>-1</sup>

|   |             |             |             |
|---|-------------|-------------|-------------|
| C | -2.11621800 | 0.62984100  | 0.09807700  |
| H | -1.61613700 | 0.93140100  | 1.00573700  |
| O | -3.28518900 | 2.30672700  | 0.16472900  |
| C | -3.34411000 | -0.86893200 | -1.16917500 |
| O | -2.74355300 | -2.09646800 | -1.25967800 |
| C | -3.35939700 | -3.13315500 | -0.47287200 |
| H | -2.85622800 | -4.06012500 | -0.74478100 |
| H | -4.42666400 | -3.20412200 | -0.70877400 |
| H | -3.22561500 | -2.93671200 | 0.59457700  |
| C | -2.71695900 | 0.13599000  | -2.12622300 |
| H | -3.46598100 | 0.87099700  | -2.42486600 |
| H | -2.33923500 | -0.37158000 | -3.01343800 |
| C | -1.60810500 | 0.80391100  | -1.29399900 |
| H | -1.42991900 | 1.84987900  | -1.54118800 |
| H | -0.65708600 | 0.27057500  | -1.36722200 |
| O | -3.02856600 | -0.28509100 | 0.20208300  |
| H | -4.43504600 | -0.93008300 | -1.17317100 |
| N | -0.15566600 | -1.14482100 | 0.79192500  |
| H | -0.58573300 | -1.96065400 | 0.35950100  |
| C | 1.21379300  | -0.97446400 | 0.28105300  |
| H | 1.16888100  | -0.97246900 | -0.81302700 |
| C | 1.73909300  | 0.39459600  | 0.76414300  |
| C | 2.16859300  | -2.11978800 | 0.72049200  |
| H | 1.00986700  | 1.15517600  | 0.46301500  |
| H | 1.76409000  | 0.38063900  | 1.85927100  |
| C | 3.10091300  | 0.74966000  | 0.21964300  |
| O | 2.15915100  | -2.40579700 | 1.95362100  |
| C | 4.25628300  | 0.59878600  | 0.99809300  |
| C | 3.23872000  | 1.21543900  | -1.09699100 |
| H | 4.16528000  | 0.23919100  | 2.01933000  |
| C | 5.51827400  | 0.89985900  | 0.47633100  |
| C | 4.49621300  | 1.51757300  | -1.62404800 |
| H | 2.35130600  | 1.34320300  | -1.71207100 |
| H | 6.40174900  | 0.77678400  | 1.09607500  |
| C | 5.64281400  | 1.35939000  | -0.83775200 |
| H | 4.58175600  | 1.87858400  | -2.64490500 |
| H | 6.62148800  | 1.59547400  | -1.24462100 |
| O | 2.87031500  | -2.66869000 | -0.17653500 |
| H | -0.09363400 | -1.35312700 | 1.78849000  |
| O | -5.18661000 | 1.28564700  | 1.74142100  |
| H | -4.01440600 | 2.01577600  | 0.77533500  |
| H | -5.35906600 | 1.67564700  | 2.61009200  |

|   |             |            |            |
|---|-------------|------------|------------|
| H | -4.91889900 | 0.36987800 | 1.90906900 |
| C | -2.63518600 | 3.46843000 | 0.70743900 |
| H | -2.23535500 | 3.26612900 | 1.70650700 |
| H | -1.82069200 | 3.73395500 | 0.03210200 |
| H | -3.34776900 | 4.29589000 | 0.75509200 |

## TS2

Imagine frequency = -1175.94 cm<sup>-1</sup>

|   |             |             |             |
|---|-------------|-------------|-------------|
| C | -2.57280700 | 0.66201100  | -0.99151300 |
| H | -3.35070700 | 1.31409600  | -1.39859600 |
| C | -3.00953700 | -1.14050300 | 0.45391300  |
| O | -1.79859600 | -1.67058400 | 0.93598900  |
| C | -1.52475400 | -1.33880300 | 2.30158200  |
| H | -0.58168400 | -1.82280600 | 2.55711000  |
| H | -2.32159500 | -1.71435800 | 2.95548400  |
| H | -1.42692300 | -0.25649900 | 2.43293200  |
| C | -3.23948600 | -1.64045900 | -0.96571200 |
| H | -4.30494200 | -1.57310900 | -1.20214700 |
| H | -2.91617600 | -2.67491100 | -1.08919200 |
| C | -2.42711400 | -0.63801200 | -1.79777300 |
| H | -2.79822000 | -0.51764900 | -2.81668900 |
| H | -1.38023400 | -0.94521500 | -1.85178000 |
| O | -2.94492900 | 0.29083900  | 0.33268000  |
| H | -3.81856300 | -1.34625000 | 1.16243000  |
| N | -1.35312900 | 1.50292900  | -0.91173800 |
| H | -1.37722100 | 2.40112700  | -0.02226100 |
| C | -0.13225700 | 0.90125100  | -0.29752800 |
| H | -0.37501500 | -0.09898900 | 0.06475500  |
| C | 1.04442200  | 0.83934500  | -1.28654900 |
| C | 0.12400400  | 1.81352900  | 0.93623800  |
| H | 0.67872300  | 0.35619200  | -2.20067600 |
| H | 1.34552800  | 1.85560800  | -1.56108200 |
| C | 2.23689900  | 0.07076000  | -0.76379200 |
| O | -0.74647700 | 2.77848800  | 0.99324700  |
| C | 3.47237200  | 0.70100900  | -0.57710300 |
| C | 2.12781700  | -1.29702600 | -0.47165800 |
| H | 3.56947300  | 1.76043600  | -0.79728300 |
| C | 4.57602000  | -0.01379000 | -0.10203700 |
| C | 3.22587200  | -2.01442300 | 0.00641600  |
| H | 1.17902900  | -1.80692900 | -0.61609500 |
| H | 5.52623600  | 0.49273200  | 0.03862800  |
| C | 4.45558500  | -1.37398400 | 0.19428900  |
| H | 3.12274500  | -3.07219900 | 0.22948200  |
| H | 5.31040800  | -1.93093300 | 0.56557400  |

|   |             |            |             |
|---|-------------|------------|-------------|
| O | 1.04100400  | 1.59686000 | 1.72887600  |
| H | -1.15919900 | 1.90889300 | -1.82740100 |

### TS3

Imagine frequency = -754.02 cm<sup>-1</sup>

|   |             |             |             |
|---|-------------|-------------|-------------|
| N | -0.73225100 | -0.67508700 | 1.18959900  |
| C | -1.55016300 | -1.35715900 | 0.38340600  |
| C | 0.72110000  | -0.48924900 | 1.03619700  |
| C | -2.92321500 | -1.72449200 | 0.88310400  |
| O | -2.13348400 | -0.30009200 | -1.03785600 |
| H | -1.07007200 | -2.06388900 | -0.28211100 |
| H | -2.04481500 | 2.39895700  | -0.25145300 |
| H | -1.16639100 | -0.14874700 | 1.93832000  |
| C | 1.18732700  | -0.67983300 | -0.42553600 |
| C | 1.11745200  | 0.91309600  | 1.56346700  |
| H | 1.23900600  | -1.21680500 | 1.66751000  |
| C | -3.89987600 | -1.63837200 | -0.29162200 |
| H | -2.88048800 | -2.73538100 | 1.30017200  |
| H | -3.21823900 | -1.04023500 | 1.68433200  |
| C | -3.53166300 | -0.33890600 | -1.01128500 |
| H | -1.69148100 | 0.85745800  | -0.83036200 |
| O | -1.27756800 | 1.91366700  | -0.59319300 |
| C | 2.67198600  | -0.44683600 | -0.58449100 |
| H | 0.95177600  | -1.70098200 | -0.73901900 |
| H | 0.63169800  | -0.00018800 | -1.07659900 |
| O | 0.45606400  | 1.92526200  | 1.11660300  |
| O | 2.05402300  | 0.98591500  | 2.37313900  |
| H | -4.94182600 | -1.64909900 | 0.03528800  |
| H | -3.75332700 | -2.47798800 | -0.97893300 |
| O | -3.97504300 | 0.81625000  | -0.29313200 |
| H | -3.93058100 | -0.29343800 | -2.03514500 |
| H | -0.49408300 | 1.86939600  | 0.19626500  |
| C | 3.15497100  | 0.77110200  | -1.07989900 |
| C | 3.59233000  | -1.43857500 | -0.21709600 |
| C | -5.33619900 | 1.16343300  | -0.53885700 |
| C | 4.52878000  | 0.99679000  | -1.20392500 |
| H | 2.45099300  | 1.54685200  | -1.36776500 |
| C | 4.96592300  | -1.21657400 | -0.33670400 |
| H | 3.23089200  | -2.39098800 | 0.16223000  |
| H | -6.02412800 | 0.39081400  | -0.17415400 |
| H | -5.51192800 | 1.32296400  | -1.61094000 |
| H | -5.52598900 | 2.09194400  | 0.00127200  |
| C | 5.43868400  | 0.00390700  | -0.83044400 |
| H | 4.88636900  | 1.94566900  | -1.59247000 |

|   |            |             |             |
|---|------------|-------------|-------------|
| H | 5.66564000 | -1.99561500 | -0.04917600 |
| H | 6.50618100 | 0.17689600  | -0.92683000 |

#### TS4

Imagine frequency = -1269.63 cm<sup>-1</sup>

|   |             |             |             |
|---|-------------|-------------|-------------|
| N | -0.12756900 | -1.36601100 | -0.85989600 |
| H | 0.25776600  | -1.34117500 | -1.79832600 |
| C | 0.83980900  | -1.20735300 | 0.13854100  |
| H | 0.43780800  | -1.12415400 | 1.14418900  |
| C | -1.41033200 | -0.66096000 | -0.76738600 |
| C | 2.16728900  | -1.22376600 | -0.06007700 |
| H | 2.55990200  | -1.28826100 | -1.07363200 |
| O | 3.58377000  | 1.20150800  | 0.92625600  |
| C | -2.24126700 | -1.10838500 | 0.44773400  |
| C | -1.17249200 | 0.85088500  | -0.74041400 |
| H | -1.96096900 | -0.90110700 | -1.67878700 |
| C | 3.16893200  | -1.18592200 | 1.05653600  |
| C | 4.12212400  | 0.00147700  | 1.00861600  |
| H | 4.44487000  | 1.93217200  | 0.33416400  |
| C | -3.63764900 | -0.52796300 | 0.41619600  |
| H | -2.27851900 | -2.20166300 | 0.42263300  |
| H | -1.73839400 | -0.80936600 | 1.37053600  |
| O | -1.34870800 | 1.41791700  | -1.95110000 |
| H | -1.12385800 | 2.36371500  | -1.88570900 |
| O | -0.79978800 | 1.47728000  | 0.23465700  |
| H | 3.77106800  | -2.10399400 | 1.08507900  |
| H | 2.66000800  | -1.12509800 | 2.02683200  |
| O | 4.98869800  | -0.19645500 | -0.39869900 |
| H | 4.95180300  | -0.10577700 | 1.72802700  |
| C | -3.97092400 | 0.59458200  | 1.18605100  |
| C | -4.61853300 | -1.08732900 | -0.41667800 |
| C | 6.09705700  | -1.11235800 | -0.32838600 |
| C | -5.25383300 | 1.14726900  | 1.12653700  |
| H | -3.21994500 | 1.03783000  | 1.83326200  |
| C | -5.90114900 | -0.53845200 | -0.47973900 |
| H | -4.37641800 | -1.96173900 | -1.01552900 |
| H | 5.71049300  | -2.12460900 | -0.20283800 |
| H | 6.75898700  | -0.85851700 | 0.50608800  |
| H | 6.64249900  | -1.04412100 | -1.27087200 |
| C | -6.22260900 | 0.58301000  | 0.29228300  |
| H | -5.49516800 | 2.01581100  | 1.73208700  |
| H | -6.64908500 | -0.98685100 | -1.12685200 |
| H | -7.21979600 | 1.00994500  | 0.24597500  |
| O | 5.27453500  | 2.17492200  | -0.44365800 |

|   |            |            |             |
|---|------------|------------|-------------|
| H | 5.31338800 | 0.88807100 | -0.56269500 |
| H | 6.05994400 | 2.54119100 | -0.01289200 |

### TS5

Imagine frequency = -1559.54 cm<sup>-1</sup>

|   |             |             |             |
|---|-------------|-------------|-------------|
| N | 1.91016800  | -0.15171100 | -0.55733800 |
| H | 2.65665100  | 0.71199300  | -0.98658600 |
| C | 2.34439300  | -1.49706500 | -0.86635100 |
| H | 1.95727900  | -1.96621700 | -1.76167700 |
| C | 0.43603100  | 0.05752700  | -0.59610600 |
| C | 3.24335500  | -1.95303200 | 0.00698000  |
| H | 3.73915700  | -2.91233300 | -0.08244800 |
| O | 3.53252500  | 1.22314200  | -0.06422500 |
| C | -0.29580200 | -0.69992600 | 0.52662500  |
| C | 0.12887000  | 1.55550800  | -0.61271600 |
| H | 0.10358900  | -0.31394200 | -1.56746800 |
| C | 3.50795200  | -0.96811800 | 1.11393000  |
| C | 2.78666900  | 0.31441900  | 0.65899700  |
| C | -1.79700300 | -0.59103500 | 0.37928400  |
| H | 0.01562400  | -1.74742400 | 0.47029900  |
| H | 0.02207400  | -0.31089000 | 1.49651000  |
| O | 0.24253600  | 2.12547000  | 0.59659700  |
| H | 0.04316500  | 3.07543700  | 0.51697700  |
| O | -0.19127600 | 2.16320500  | -1.61468700 |
| H | 4.57503300  | -0.75240800 | 1.23519700  |
| H | 3.13076600  | -1.33762200 | 2.07528800  |
| H | 2.14593200  | 0.75325300  | 1.43185800  |
| C | -2.53522900 | 0.30270300  | 1.16627800  |
| C | -2.47061400 | -1.36364900 | -0.57854800 |
| C | -3.91822900 | 0.42319300  | 1.00089900  |
| H | -2.02452300 | 0.90582900  | 1.91101000  |
| C | -3.85156500 | -1.24501300 | -0.74714200 |
| H | -1.91122600 | -2.06611500 | -1.19110000 |
| C | -4.57985900 | -0.34893300 | 0.04250200  |
| H | -4.47632900 | 1.11818700  | 1.62097100  |
| H | -4.35855700 | -1.85283000 | -1.49041500 |
| H | -5.65389400 | -0.25695800 | -0.08633000 |

### TS6

Imagine frequency = -618.86 cm<sup>-1</sup>

|   |            |             |             |
|---|------------|-------------|-------------|
| O | 3.18757500 | 0.96014700  | -0.84953100 |
| H | 2.78178500 | 1.48438500  | -0.14373800 |
| H | 4.09208500 | 0.38795100  | -0.40630400 |
| C | 0.72476900 | -0.99186000 | 1.21838300  |

|   |             |             |             |
|---|-------------|-------------|-------------|
| C | 1.74854200  | -1.85584200 | 1.25833500  |
| H | 0.00691900  | -0.69709800 | 1.96667200  |
| C | 2.43576000  | -1.85159000 | -0.07383700 |
| H | 2.05272800  | -2.44410500 | 2.11185400  |
| C | 1.65704800  | -0.85134500 | -0.83665200 |
| H | 3.50420800  | -1.52397500 | -0.00733700 |
| H | 2.43874700  | -2.82418200 | -0.58439900 |
| H | 1.71804000  | -0.62616900 | -1.88853400 |
| O | 5.00280200  | -0.34969200 | 0.08852100  |
| N | 0.65774000  | -0.42010500 | -0.09190300 |
| C | -0.34507000 | 0.55667100  | -0.52372400 |
| H | -0.18621700 | 0.69871800  | -1.59676500 |
| H | 5.70151300  | -0.47987300 | -0.56656300 |
| C | -1.76025100 | 0.04881100  | -0.29951000 |
| C | -2.43133100 | 0.26212800  | 0.91203600  |
| C | -2.38283700 | -0.68520300 | -1.31670800 |
| C | -3.71148200 | -0.26044300 | 1.10452700  |
| H | -1.96791100 | 0.83939400  | 1.70702000  |
| C | -3.66190400 | -1.20787200 | -1.12250300 |
| H | -1.86559500 | -0.84857000 | -2.25737500 |
| C | -4.32704200 | -0.99667100 | 0.08888200  |
| H | -4.22535500 | -0.08968500 | 2.04469000  |
| H | -4.13870700 | -1.77379400 | -1.91606500 |
| H | -5.32298600 | -1.40074100 | 0.23914800  |
| C | -0.06253500 | 1.91885700  | 0.13378700  |
| O | 0.89045700  | 2.13955600  | 0.84766200  |
| O | -0.93335200 | 2.89386600  | -0.16320300 |
| H | -1.67529700 | 2.57362800  | -0.70466900 |

### TS1' (without one explicit H<sub>3</sub>O<sup>+</sup> molecule)

Imagine frequency = -405.74 cm<sup>-1</sup>

|   |            |             |             |
|---|------------|-------------|-------------|
| C | 1.99326400 | 0.72439000  | -0.44372900 |
| H | 1.43146000 | 1.13125500  | -1.26125700 |
| O | 2.84283000 | 2.78183600  | -1.02016800 |
| C | 1.81914300 | 3.70146900  | -0.93581200 |
| H | 0.81558400 | 3.27385800  | -1.18861400 |
| H | 1.94227000 | 4.56499300  | -1.62482400 |
| H | 1.69227100 | 4.15075900  | 0.07897500  |
| C | 3.85159900 | -0.23232700 | 0.48794100  |
| O | 3.52198100 | -1.52283600 | 0.90893300  |
| C | 4.07388300 | -2.56542700 | 0.09114000  |
| H | 3.79986400 | -3.50796900 | 0.56513500  |
| H | 5.16579900 | -2.47796600 | 0.04647900  |
| H | 3.66159000 | -2.52901500 | -0.92226200 |

|   |             |             |             |
|---|-------------|-------------|-------------|
| C | 3.35328300  | 0.79658000  | 1.49491700  |
| H | 3.97844600  | 1.68791900  | 1.43209900  |
| H | 3.39114800  | 0.39663500  | 2.50865400  |
| C | 1.92346200  | 1.11488000  | 1.01314700  |
| H | 1.66243700  | 2.16544300  | 1.12042900  |
| H | 1.18222000  | 0.52081700  | 1.55100600  |
| O | 3.12865400  | 0.08914500  | -0.74556800 |
| H | 4.91025800  | -0.16463100 | 0.22255000  |
| N | 0.76894300  | -0.94648600 | -0.41513000 |
| H | 1.31578200  | -1.59196800 | 0.15449500  |
| C | -0.62915200 | -0.88311000 | 0.05028900  |
| H | -0.62172600 | -0.75676400 | 1.13555900  |
| C | -1.31890100 | 0.33233300  | -0.60537700 |
| C | -1.37754900 | -2.20554500 | -0.29275600 |
| H | -0.75185100 | 1.23180900  | -0.34533300 |
| H | -1.26438100 | 0.21289500  | -1.69286800 |
| C | -2.75445100 | 0.50726900  | -0.17396700 |
| O | -1.19560000 | -2.64361300 | -1.46496800 |
| C | -3.81168100 | 0.07001700  | -0.98250600 |
| C | -3.05537300 | 1.09436400  | 1.06403000  |
| H | -3.59241500 | -0.38671000 | -1.94358900 |
| C | -5.13847100 | 0.21005200  | -0.56475800 |
| C | -4.37882000 | 1.23563800  | 1.48718900  |
| H | -2.24555600 | 1.44467500  | 1.69922700  |
| H | -5.94497900 | -0.13390000 | -1.20572100 |
| C | -5.42654400 | 0.79203300  | 0.67299100  |
| H | -4.59256400 | 1.69405400  | 2.44832000  |
| H | -6.45636300 | 0.90303600  | 0.99880400  |
| O | -2.09482000 | -2.71043300 | 0.61190400  |
| H | 0.77160700  | -1.31231600 | -1.36886100 |

**TS1'' (with one explicit water molecule)**

Imagine frequency = -379.18 cm<sup>-1</sup>

|   |             |             |             |
|---|-------------|-------------|-------------|
| C | -1.84735000 | -0.53887300 | -0.03032600 |
| H | -1.34648600 | -1.07173900 | -0.81523100 |
| O | -2.90624200 | -2.56520700 | -0.10224300 |
| C | -3.53077300 | 0.73813500  | 0.85603400  |
| O | -3.07745900 | 2.04377100  | 1.01271800  |
| C | -3.62531700 | 2.97646400  | 0.06749100  |
| H | -3.25212200 | 3.95966600  | 0.35344600  |
| H | -4.72029000 | 2.96755200  | 0.11472400  |
| H | -3.29869800 | 2.73895500  | -0.94973400 |
| C | -3.02106900 | -0.14820300 | 1.98509100  |
| H | -3.71889100 | -0.97344200 | 2.13091000  |



|   |             |             |             |
|---|-------------|-------------|-------------|
| H | -2.93092800 | 0.42059300  | 2.91077600  |
| C | -1.67350800 | -0.68251400 | 1.45894800  |
| H | -1.49725900 | -1.72310600 | 1.72374700  |
| H | -0.83377100 | -0.08634700 | 1.81908400  |
| O | -2.93259200 | 0.14977300  | -0.35851600 |
| H | -4.60860200 | 0.70874400  | 0.67543400  |
| N | -0.45046500 | 1.05957600  | -0.36832100 |
| H | -0.90688200 | 1.82636300  | 0.12475600  |
| C | 0.97047300  | 0.95994500  | 0.00730700  |
| H | 1.04097900  | 1.01122900  | 1.09688100  |
| C | 1.51720800  | -0.39962400 | -0.47951900 |
| C | 1.78575500  | 2.13980800  | -0.59984100 |
| H | 0.90811300  | -1.19256100 | -0.03342800 |
| H | 1.38368100  | -0.45286700 | -1.56544600 |
| C | 2.96656800  | -0.62544300 | -0.12403600 |
| O | 1.55240800  | 2.39259600  | -1.81689600 |
| C | 3.98282900  | -0.42490700 | -1.06739700 |
| C | 3.32497200  | -1.02070000 | 1.17342600  |
| H | 3.71913300  | -0.11938400 | -2.07610000 |
| C | 5.32565900  | -0.60904800 | -0.72455300 |
| C | 4.66473200  | -1.20535300 | 1.52193300  |
| H | 2.54709500  | -1.18737000 | 1.91448800  |
| H | 6.09939600  | -0.44985300 | -1.46994400 |
| C | 5.67138000  | -0.99853100 | 0.57251200  |
| H | 4.92288700  | -1.51351600 | 2.53089800  |
| H | 6.71350900  | -1.14390000 | 0.84055700  |
| O | 2.60134500  | 2.72684700  | 0.16103900  |
| H | -0.50259400 | 1.27261600  | -1.36573700 |
| O | -4.16477600 | -1.93446800 | -2.22361200 |
| H | -3.65930900 | -2.22509200 | -1.36770200 |
| H | -4.11737900 | -0.97000600 | -2.19401000 |
| C | -1.92727200 | -3.53267400 | -0.30315500 |
| H | -1.40145100 | -3.42594900 | -1.27641100 |
| H | -1.13803200 | -3.50430900 | 0.47734500  |
| H | -2.33602500 | -4.56070500 | -0.28445900 |

#### TS7

Imagine frequency = -126.39 cm<sup>-1</sup>

|   |             |             |             |
|---|-------------|-------------|-------------|
| C | -2.39390400 | -0.59716100 | 0.04559900  |
| H | -1.88679400 | -1.15863000 | -0.72406700 |
| O | -3.87517800 | -2.22117700 | 0.06999500  |
| C | -3.59461200 | 1.19090400  | 0.88956200  |
| O | -2.85519800 | 2.33966100  | 0.87399800  |

|   |             |             |             |
|---|-------------|-------------|-------------|
| C | -3.25817200 | 3.31444600  | -0.11009900 |
| H | -2.65965500 | 4.20336600  | 0.08340600  |
| H | -4.32184100 | 3.54665900  | 0.00384700  |
| H | -3.06063400 | 2.94420600  | -1.11972700 |
| C | -3.23104300 | 0.29128500  | 2.06271900  |
| H | -4.10662900 | -0.28760700 | 2.35950900  |
| H | -2.89572700 | 0.89260800  | 2.90723900  |
| C | -2.13533600 | -0.63935200 | 1.51155900  |
| H | -2.18154100 | -1.65818300 | 1.89522200  |
| H | -1.12699000 | -0.25960400 | 1.69397300  |
| O | -3.18033100 | 0.34862900  | -0.32636700 |
| H | -4.65903800 | 1.36337200  | 0.71738200  |
| N | -0.27994800 | 0.86876600  | -0.53235500 |
| H | -0.63124700 | 1.70782600  | -0.07435100 |
| C | 1.07672700  | 0.55695800  | -0.09265500 |
| H | 1.07888900  | 0.46601000  | 0.99700100  |
| C | 1.52160100  | -0.78963400 | -0.71291600 |
| C | 2.08384000  | 1.64093400  | -0.47666700 |
| H | 0.79792600  | -1.54465900 | -0.39175700 |
| H | 1.44912300  | -0.70368100 | -1.80259100 |
| C | 2.92107400  | -1.19218000 | -0.31255500 |
| O | 2.12667300  | 2.16902400  | -1.57548300 |
| C | 4.01339900  | -0.91800200 | -1.14657900 |
| C | 3.15767600  | -1.79832800 | 0.92948600  |
| H | 3.84417700  | -0.45056100 | -2.11278500 |
| C | 5.31498200  | -1.23420400 | -0.74694700 |
| C | 4.45618300  | -2.11750200 | 1.33252900  |
| H | 2.31895700  | -2.02006800 | 1.58440900  |
| H | 6.14983500  | -1.01436300 | -1.40561100 |
| C | 5.54033600  | -1.83316000 | 0.49550000  |
| H | 4.62178500  | -2.58830800 | 2.29695100  |
| H | 6.55038000  | -2.08054400 | 0.80752000  |
| O | 2.92905800  | 1.92091800  | 0.52236300  |
| H | -0.29314200 | 1.04778100  | -1.53507600 |
| O | -5.37230200 | -1.20411200 | -1.94515700 |
| H | -4.45535000 | -1.95041200 | -0.68302000 |
| H | -5.53112200 | -1.71322200 | -2.75238200 |
| H | -4.92289800 | -0.39426400 | -2.22770500 |
| C | -3.36269000 | -3.53846500 | -0.16646500 |
| H | -2.82506400 | -3.59246800 | -1.11970300 |
| H | -2.67664000 | -3.77403900 | 0.64945000  |
| H | -4.17890300 | -4.26753800 | -0.16656200 |
| C | 3.99356400  | 2.85586600  | 0.22775600  |
| H | 3.57628400  | 3.81817700  | -0.07334100 |

|   |            |            |             |
|---|------------|------------|-------------|
| H | 4.55680700 | 2.95167400 | 1.15385600  |
| H | 4.62516900 | 2.45711200 | -0.56834800 |

**TS7'**

Imagine frequency = -332.49 cm<sup>-1</sup>

|   |             |             |             |
|---|-------------|-------------|-------------|
| C | 2.02075000  | -0.53028100 | 0.03372800  |
| H | 1.55754700  | -1.08864500 | 0.82598300  |
| O | 3.25570700  | -2.56301400 | 0.37801300  |
| C | 3.65941400  | 0.80365200  | -0.85023400 |
| O | 3.08093400  | 2.03132500  | -1.14796800 |
| C | 3.49871300  | 3.10825300  | -0.29067200 |
| H | 3.02189900  | 4.00911900  | -0.67587000 |
| H | 4.58791000  | 3.22014700  | -0.32695600 |
| H | 3.17926600  | 2.93301100  | 0.74125600  |
| C | 3.32578700  | -0.22770700 | -1.91931900 |
| H | 4.10695700  | -0.98866100 | -1.93347400 |
| H | 3.25670400  | 0.24139900  | -2.90079200 |
| C | 1.99705700  | -0.84706500 | -1.43938300 |
| H | 1.95709200  | -1.92478600 | -1.58312800 |
| H | 1.13667900  | -0.39739400 | -1.93743900 |
| O | 3.03260300  | 0.25245800  | 0.37391000  |
| H | 4.71684400  | 0.90578000  | -0.59541300 |
| N | 0.51800800  | 0.90948700  | 0.14186700  |
| H | 0.92521000  | 1.65689600  | -0.42142800 |
| C | -0.85037300 | 0.57857700  | -0.28161700 |
| H | -0.83699300 | 0.38522900  | -1.35590000 |
| C | -1.35038400 | -0.67647400 | 0.46671900  |
| C | -1.80987400 | 1.75251200  | -0.07795800 |
| H | -0.69546000 | -1.50920700 | 0.19554200  |
| H | -1.24780300 | -0.50827500 | 1.54309900  |
| C | -2.78283300 | -1.01289200 | 0.12293100  |
| O | -1.79262900 | 2.17517600  | 1.19189500  |
| C | -3.83067800 | -0.64381300 | 0.97658600  |
| C | -3.08846200 | -1.66103000 | -1.08236900 |
| H | -3.60600400 | -0.14315500 | 1.91419600  |
| C | -5.15855000 | -0.91412400 | 0.63331500  |
| C | -4.41363600 | -1.93248800 | -1.42879500 |
| H | -2.28409500 | -1.95665100 | -1.75096900 |
| H | -5.95920100 | -0.62404500 | 1.30690400  |
| C | -5.45353000 | -1.55777700 | -0.57139600 |
| H | -4.63420100 | -2.43765500 | -2.36426500 |
| H | -6.48410300 | -1.76951400 | -0.83913600 |
| O | -2.50634000 | 2.23071300  | -0.95343500 |
| H | 0.53918500  | 1.20608300  | 1.11689500  |

|   |             |             |             |
|---|-------------|-------------|-------------|
| O | 4.34289600  | -1.59404400 | 2.44802500  |
| H | 3.90243800  | -2.02372100 | 1.60682100  |
| H | 4.21111000  | -0.64658700 | 2.31359900  |
| C | 2.30642600  | -3.54286500 | 0.64277500  |
| H | 1.79991800  | -3.40879600 | 1.62328700  |
| H | 1.49601500  | -3.56517800 | -0.11829700 |
| H | 2.73265200  | -4.56512100 | 0.65514900  |
| C | -2.67914500 | 3.26882300  | 1.52873300  |
| H | -2.50579700 | 3.46404500  | 2.58485500  |
| H | -2.43478000 | 4.14521400  | 0.92640700  |
| H | -3.71450900 | 2.97133000  | 1.35421500  |

### References

- [S1] P. Ryabchuk, T. Leischner, C. Kreyenschulte, A. Spannenberg, K. Junge and M. Beller, *Angew. Chem. Int. Ed.*, 2020, **59**, 18679–18685.
- [S2] A. P. Pawar, J. Yadav, N. A. Mir, E. Iype, K. Rangan, S. Anthal, R. Kant and I. Kumar, *Chem. Commun.*, 2021, **57**, 251–254.
- [S3] (a) I. T. Devedjiev, S. G. Bairyamov and V. S. Videva, *Heteroat. Chem.*, 2008, **19**, 252–255; (b) R. A. Cormanich, L. C. Ducati, C. F. Tormena and R. Rittner, *Spectrochim. Acta - Part A Mol. Biomol. Spectrosc.*, 2014, **123**, 482–489; (c) S.-S. Wang, F. Zou, W.-Q. Meng, J.-Z. Zhang, Y. Feng, L. Zhang and Y. Liu, *J. Chem. Res.*, 2015, **39**, 159–161.

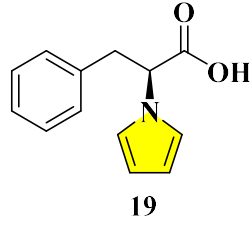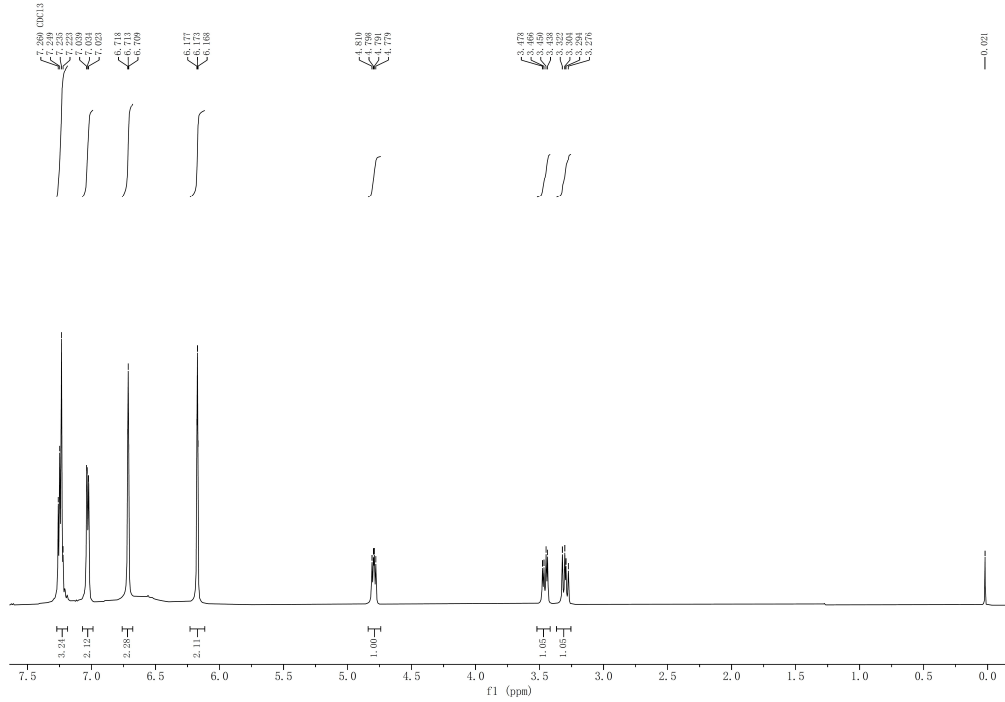

DMTHF, 10% CA, 90 °C, 2 h for <sup>1</sup>H NMR of purified Compound **19** (500 MHz, CDCl<sub>3</sub>)

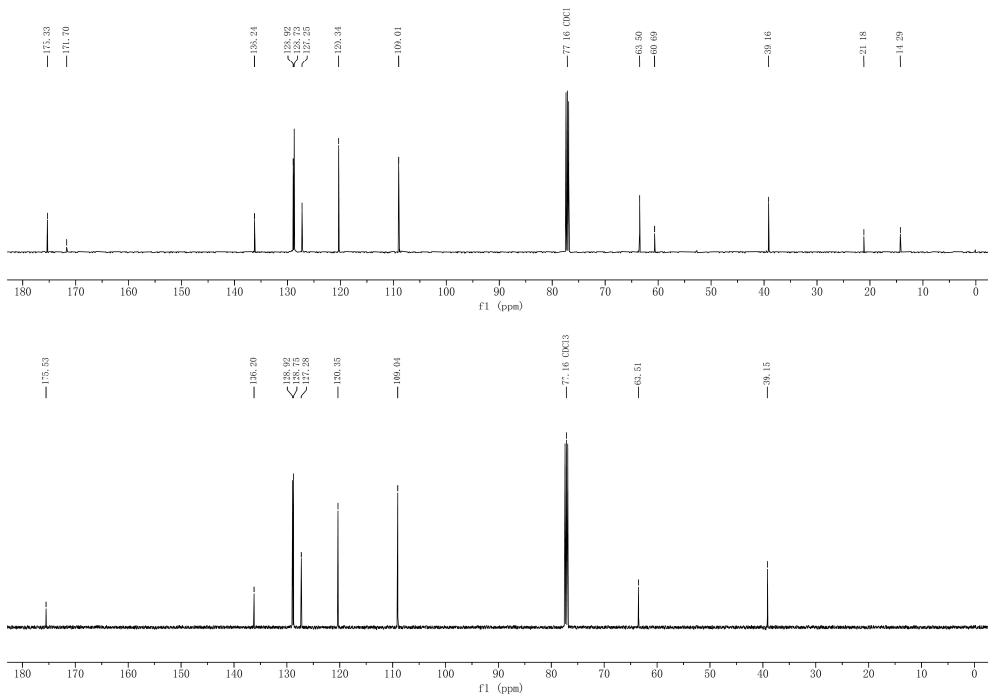

DMTHF, 0.75% CA, u-crude vs 10% CA, d-purified, 90 °C, 2 h, <sup>13</sup>C NMR-19 (126 MHz, CDCl<sub>3</sub>)

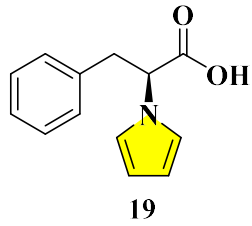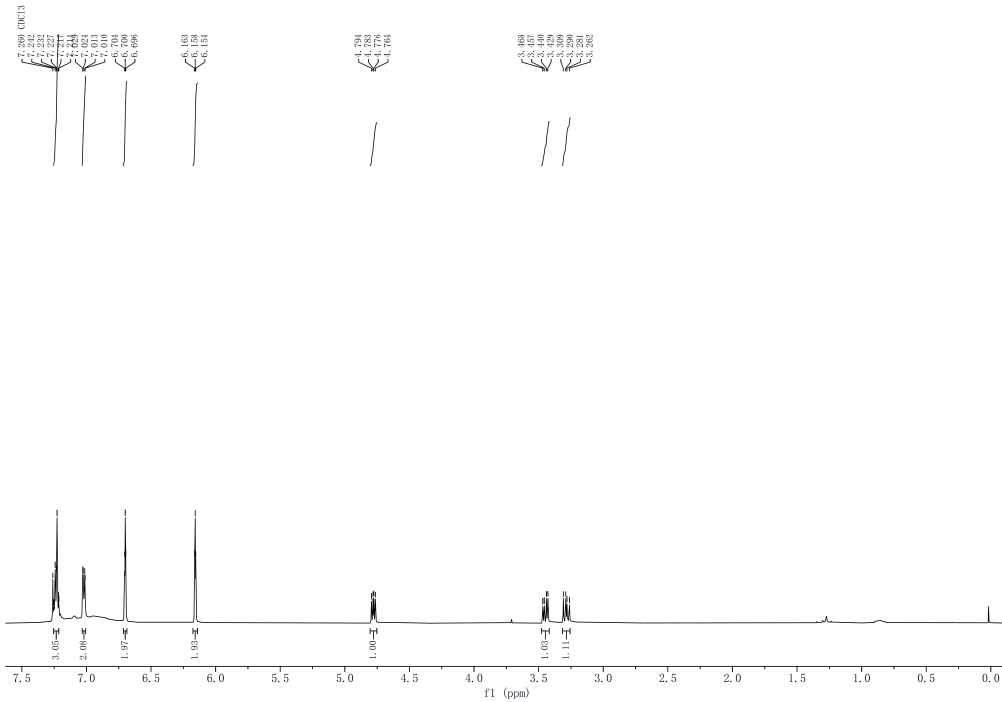

DMTHF, 0.75% CA, 90 °C, 1 h for crude <sup>1</sup>H NMR of Compound **19** (500 MHz, CDCl<sub>3</sub>)

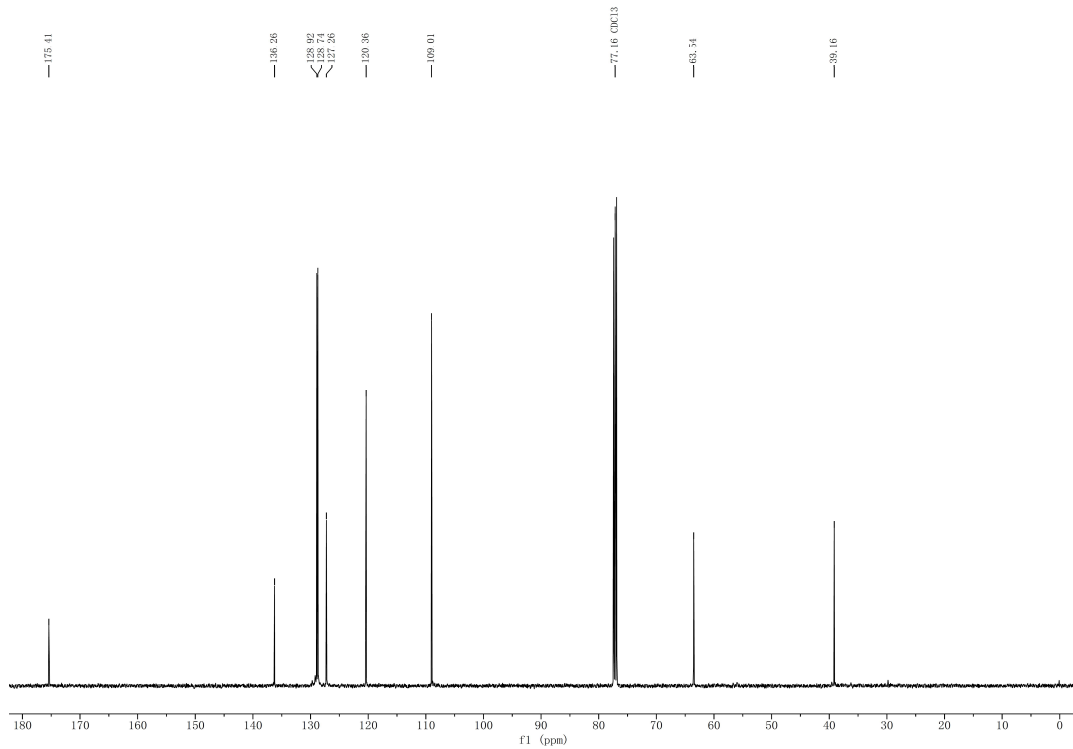

DMTHF, 0.75% CA, 90 °C, 1 h for crude <sup>13</sup>C NMR of Compound **19** (126 MHz, CDCl<sub>3</sub>)

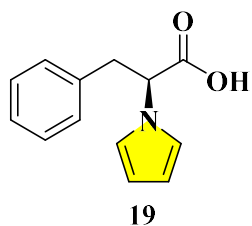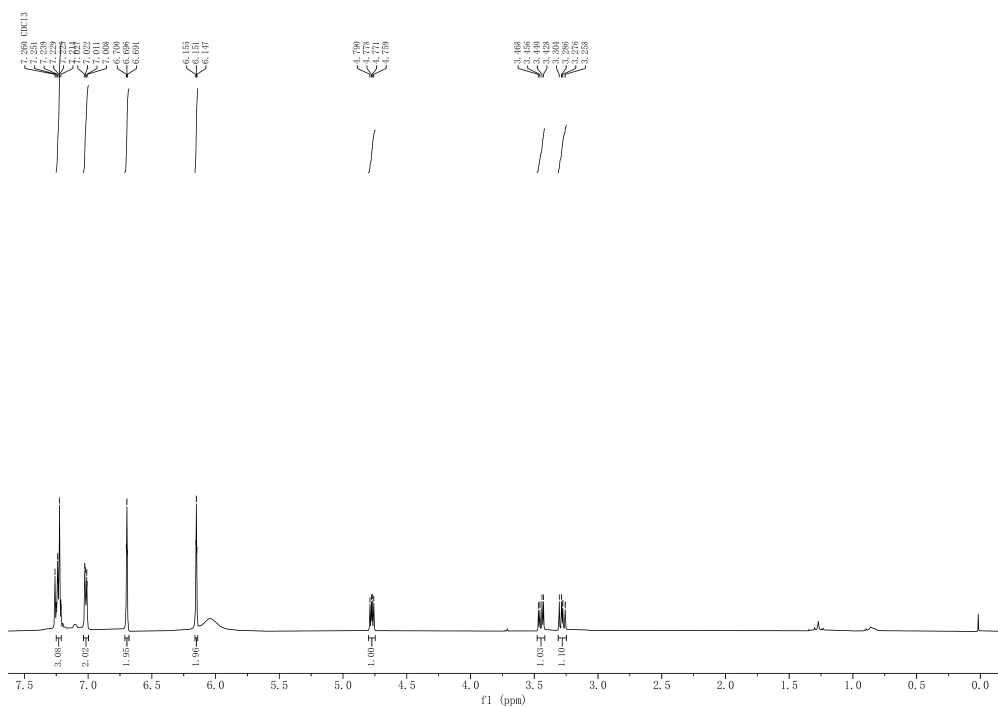

DMTHF, 0.75% CA, 90 °C, 30 min for crude  $^1\text{H}$  NMR of Compound **19** (500 MHz,  $\text{CDCl}_3$ )

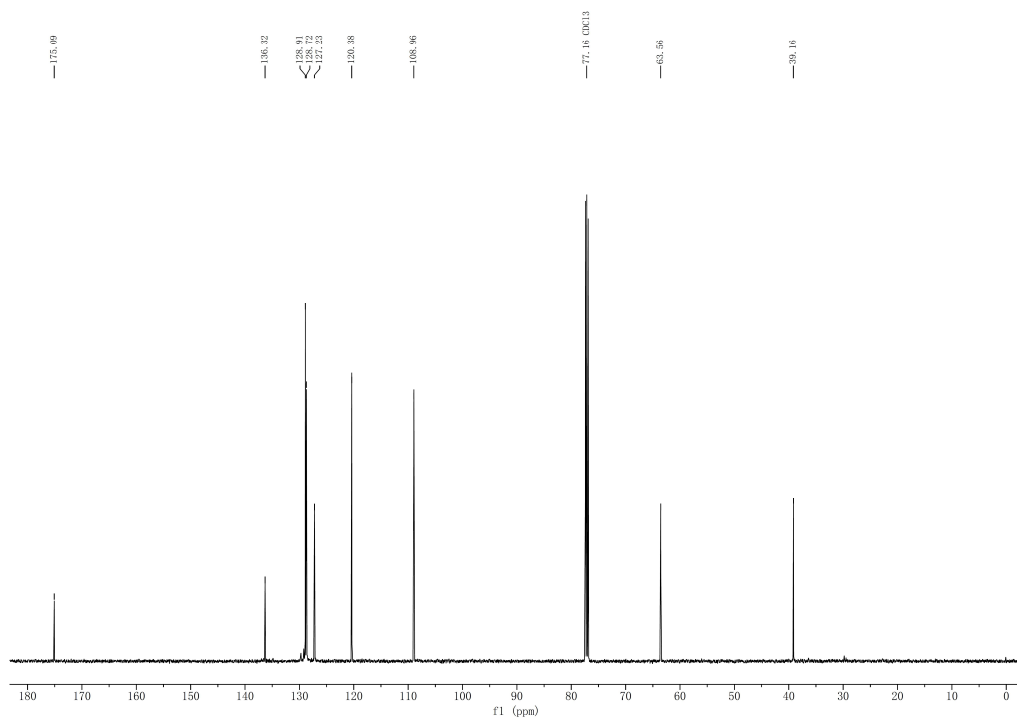

DMTHF, 0.75% CA, 90 °C, 30 min for crude  $^{13}\text{C}$  NMR of Compound **19** (126 MHz,  $\text{CDCl}_3$ )

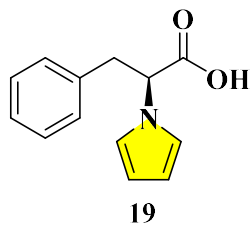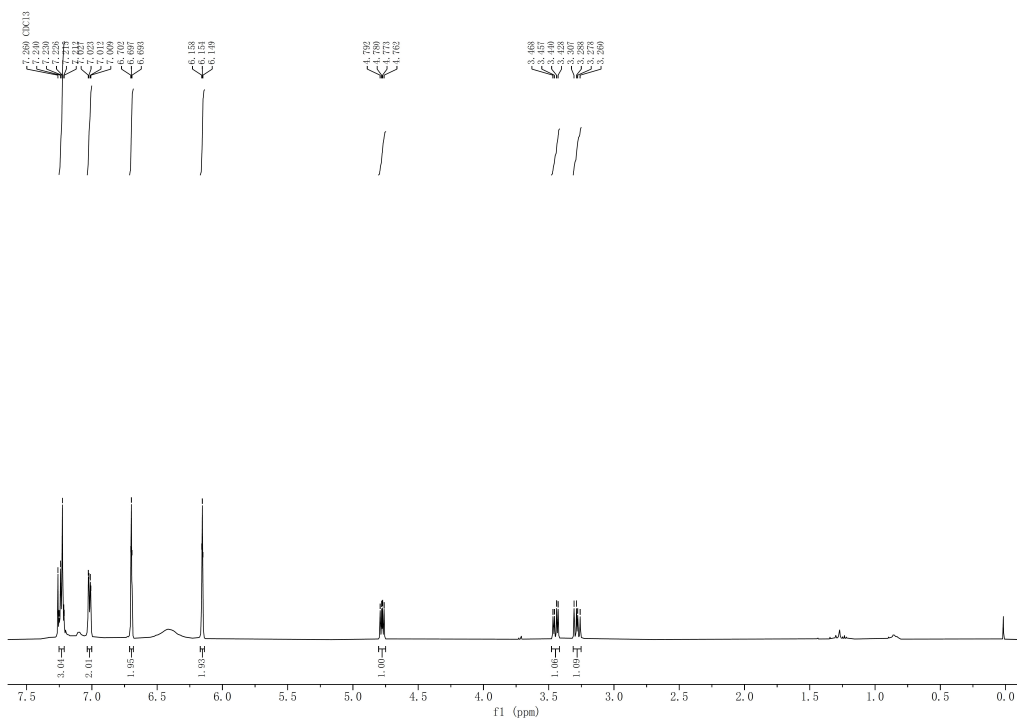

DMTHF, 0.75% CA, 90 °C, 15 min for crude  $^1\text{H}$  NMR of Compound **19** (500 MHz,  $\text{CDCl}_3$ )

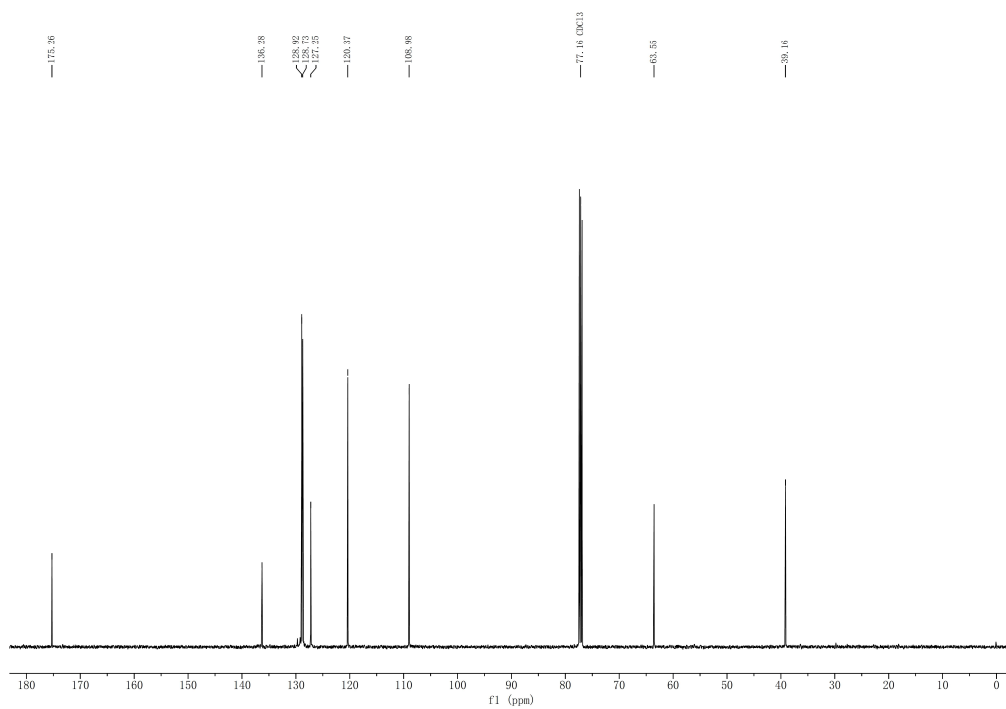

DMTHF, 0.75% CA, 90 °C, 15 min for crude  $^{13}\text{C}$  NMR of Compound **19** (126 MHz,  $\text{CDCl}_3$ )



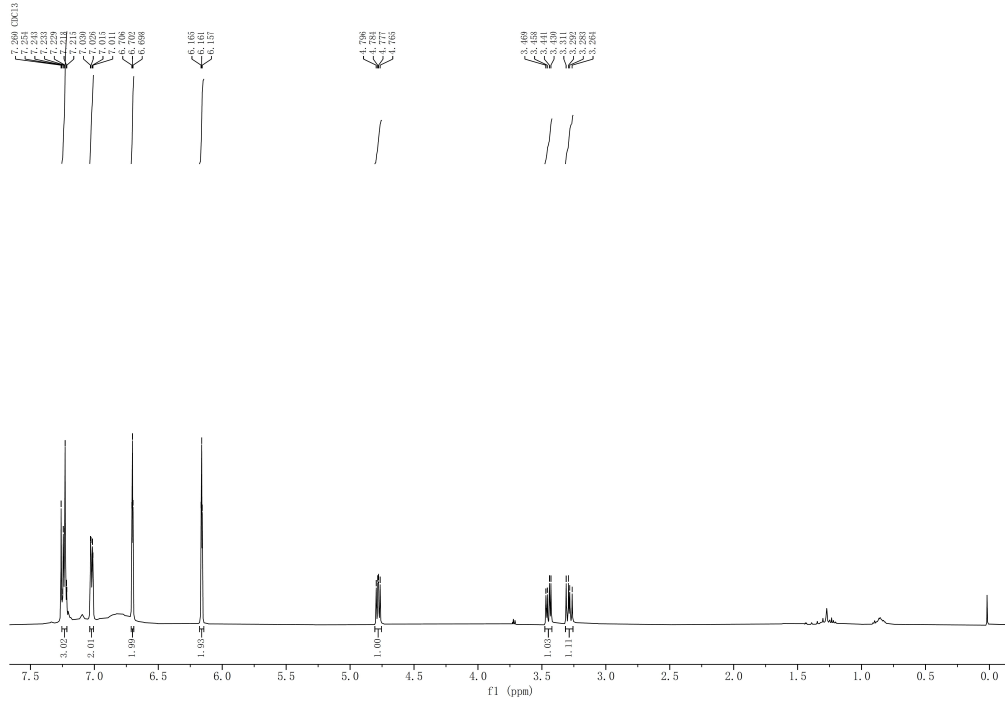

DMTHF, 0.3% CA, 90 °C, 30 min for crude  $^1\text{H}$  NMR of Compound **19** (500 MHz,  $\text{CDCl}_3$ )

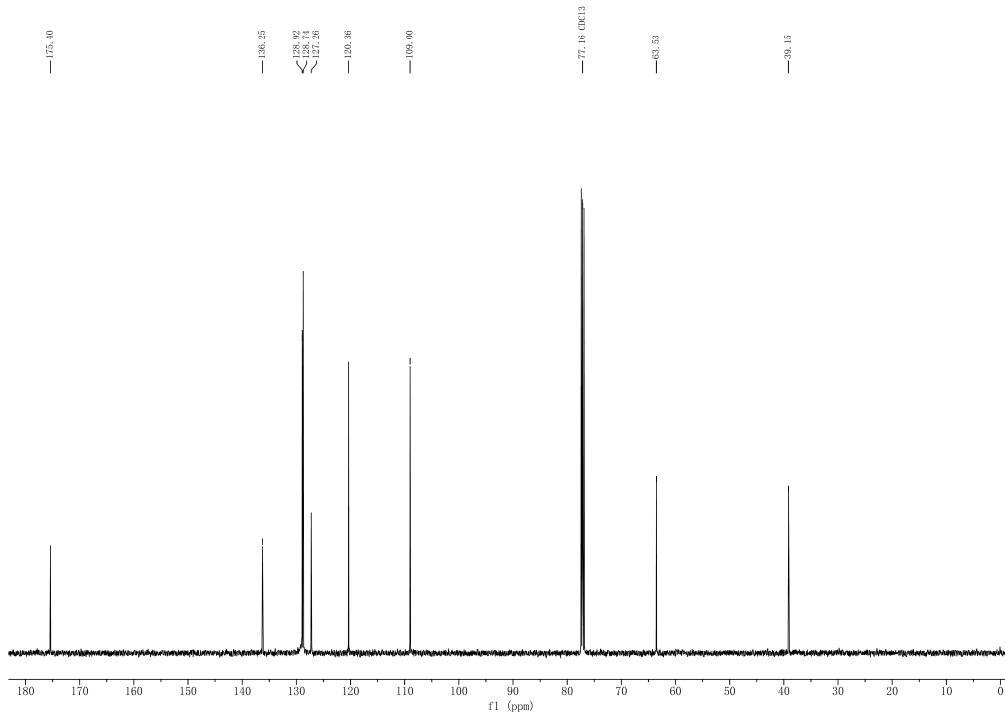

DMTHF, 0.3% CA, 90 °C, 30 min for crude  $^{13}\text{C}$  NMR of Compound **19** (126 MHz,  $\text{CDCl}_3$ )

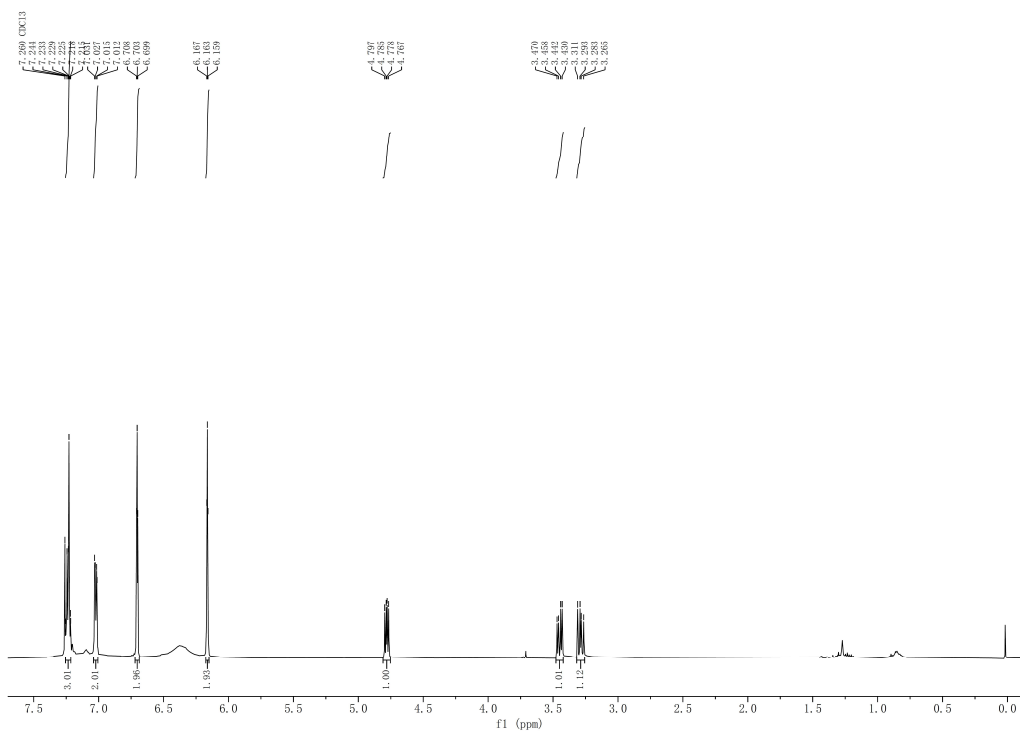

DMTHF, 0.1% CA, 90 °C, 30 min for crude <sup>1</sup>H NMR of Compound **19** (500 MHz, CDCl<sub>3</sub>)

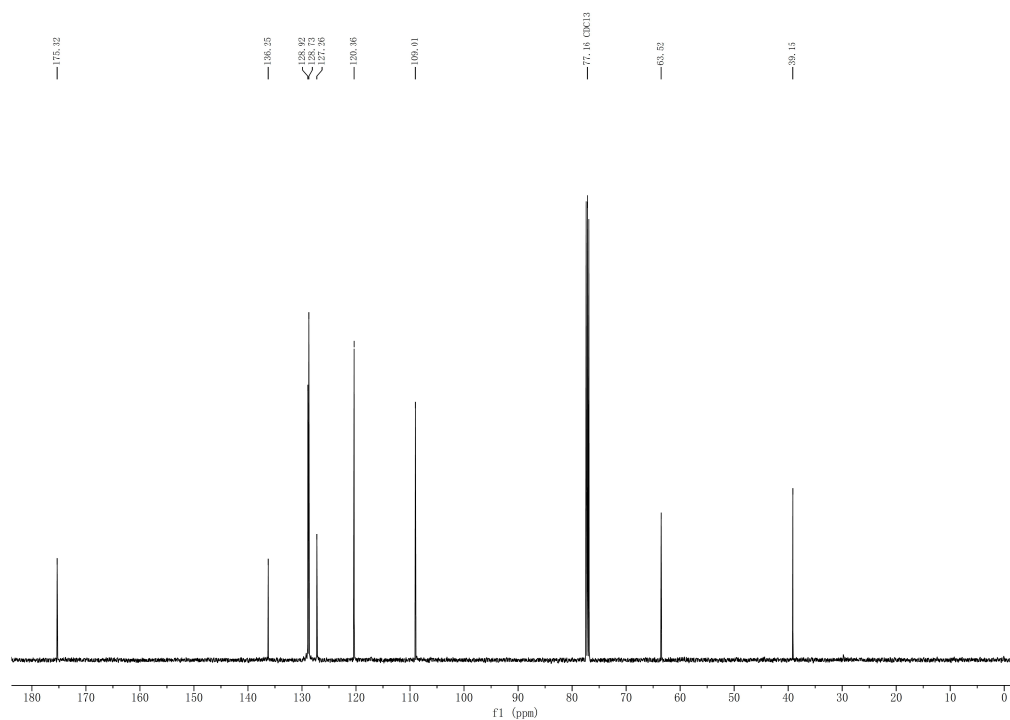

DMTHF, 0.1% CA, 90 °C, 30 min for crude <sup>13</sup>C NMR of Compound **19** (126 MHz, CDCl<sub>3</sub>)

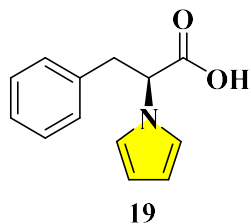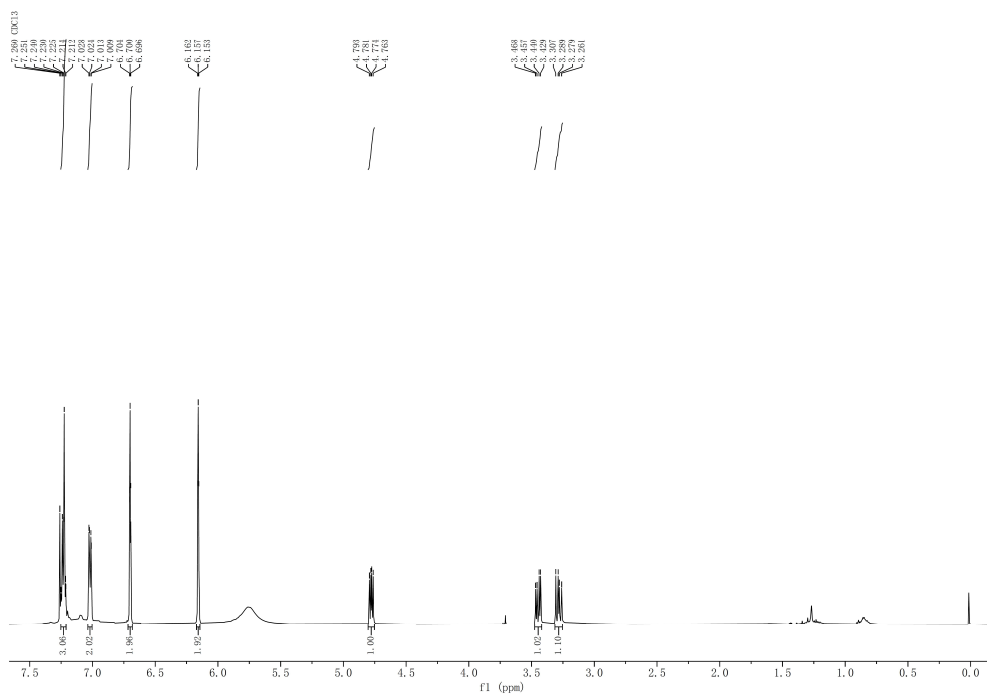

DMTHF, 0.05% CA, 90 °C, 30 min for crude  $^1\text{H}$  NMR of Compound **19** (500 MHz,  $\text{CDCl}_3$ )

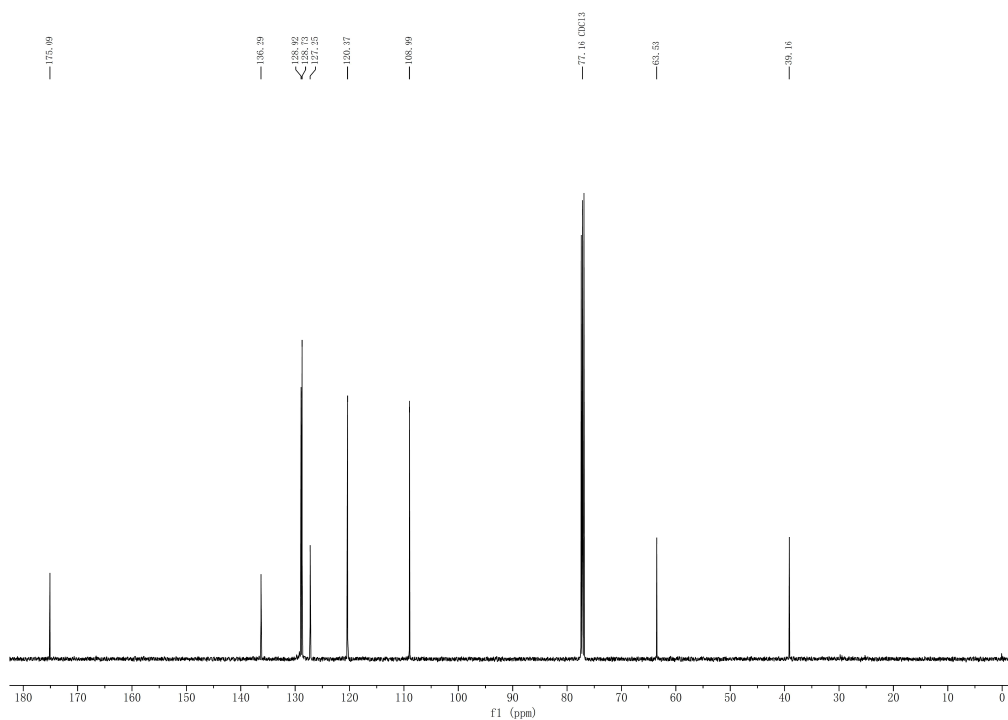

DMTHF, 0.05% CA, 90 °C, 30 min for crude  $^{13}\text{C}$  NMR of Compound **19** (126 MHz,  $\text{CDCl}_3$ )

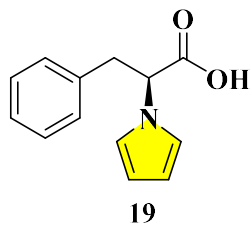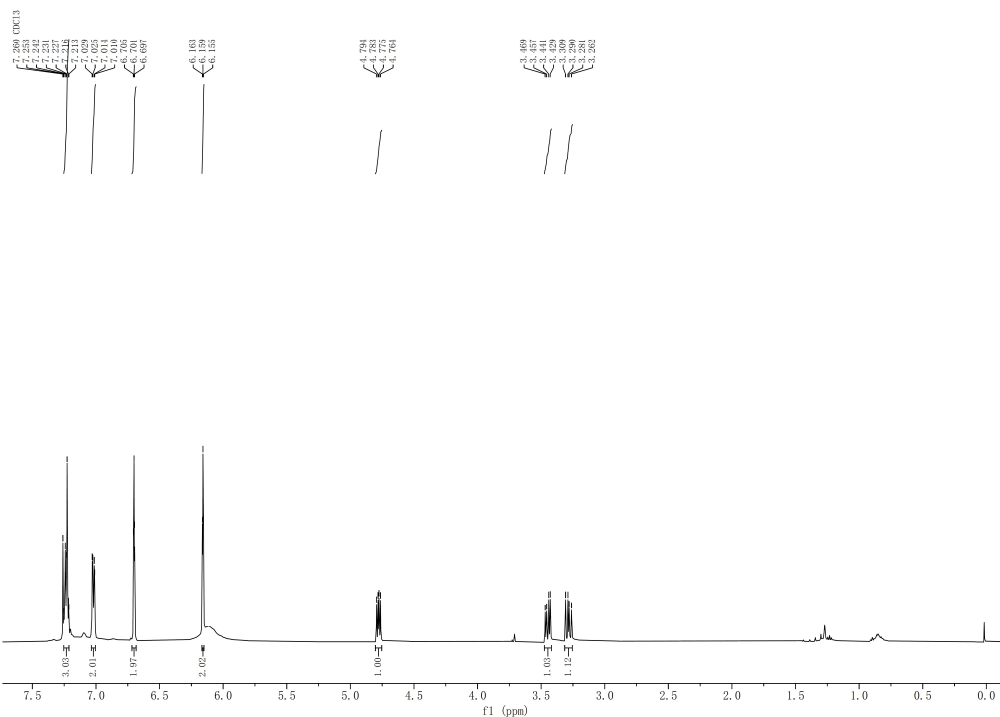

DMTHF, 0.01% CA, 90 °C, 30 min for crude  $^1\text{H}$  NMR of Compound **19** (500 MHz,  $\text{CDCl}_3$ )

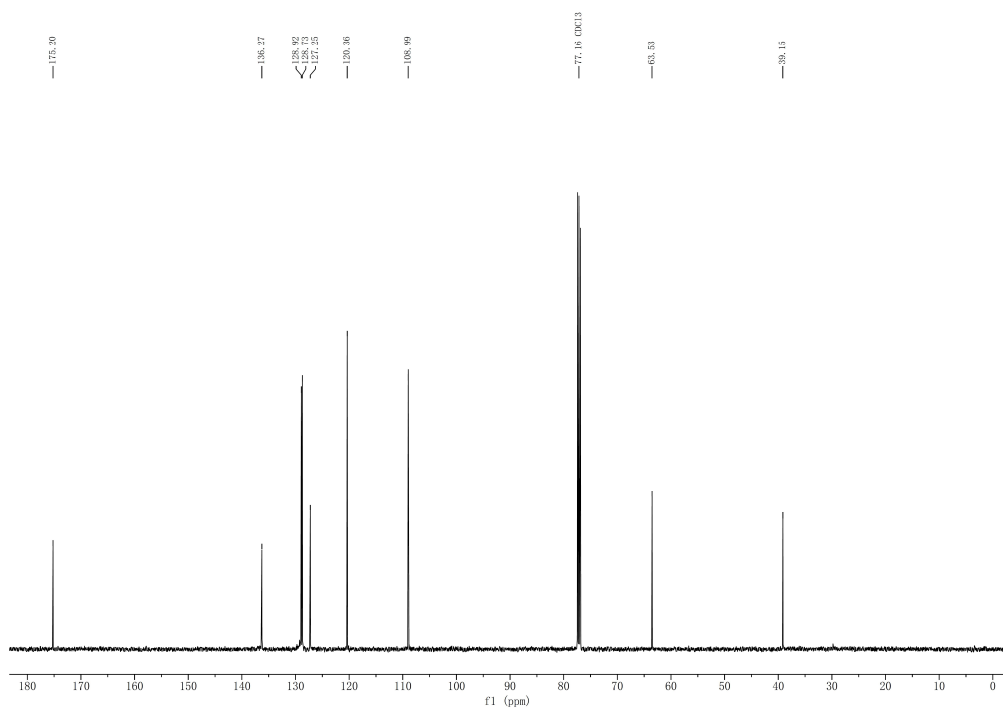

DMTHF, 0.01% CA, 90 °C, 30 min for crude  $^{13}\text{C}$  NMR of Compound **19** (126 MHz,  $\text{CDCl}_3$ )

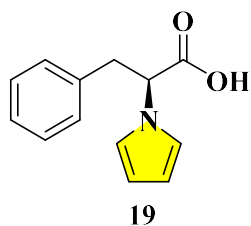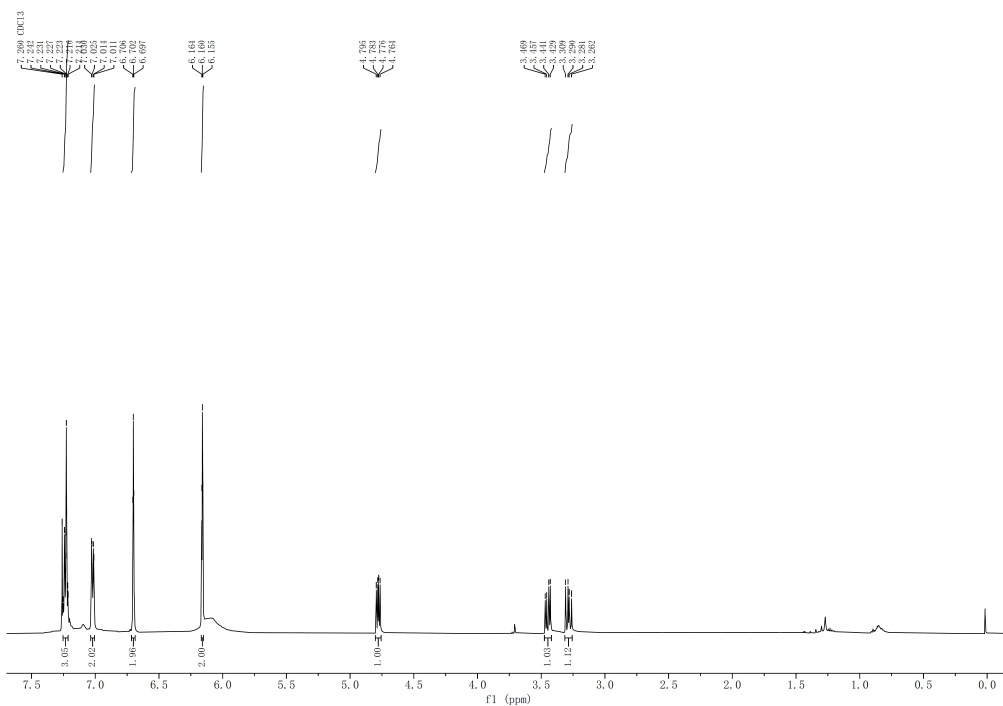

DMTHF, 0% CA, 90 °C, 30 min for crude  $^1\text{H}$  NMR of Compound **19** (500 MHz,  $\text{CDCl}_3$ )

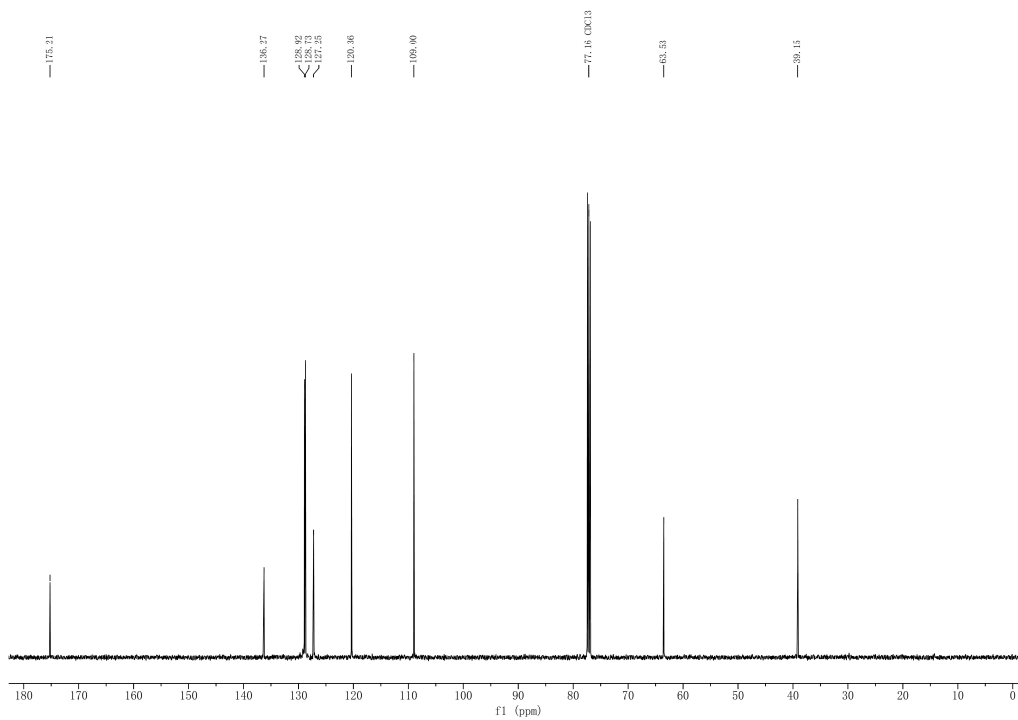

DMTHF, 0% CA, 90 °C, 30 min for crude  $^{13}\text{C}$  NMR of Compound **19** (126 MHz,  $\text{CDCl}_3$ )

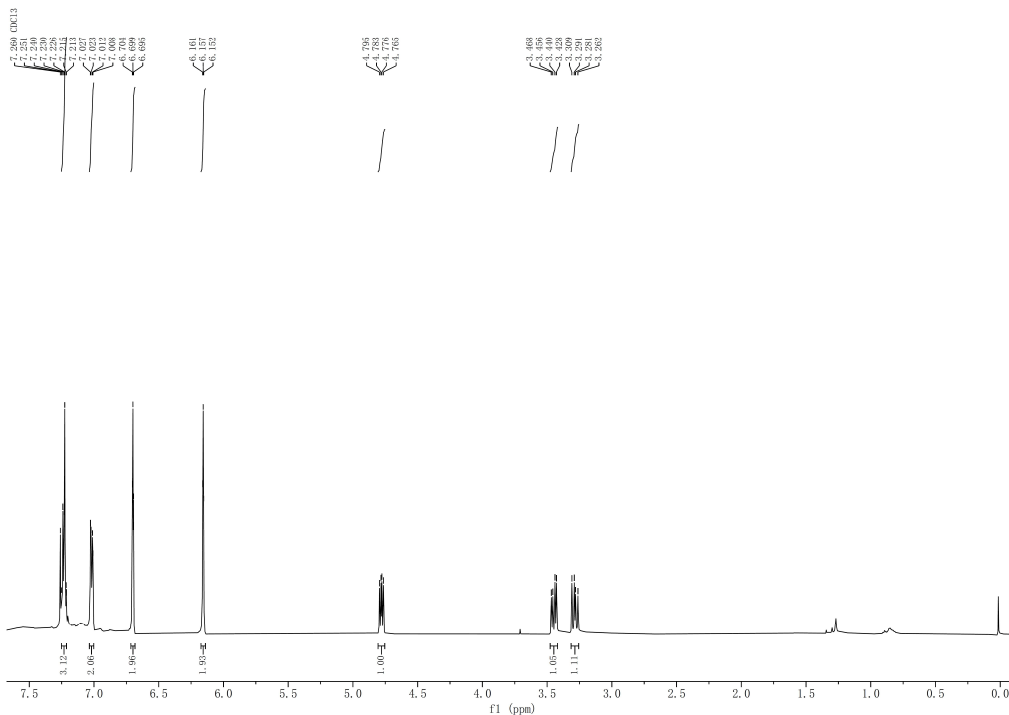

DMTHF, 0% CA, 90 °C, 15 min for crude  $^1\text{H}$  NMR of Compound **19** (500 MHz,  $\text{CDCl}_3$ )

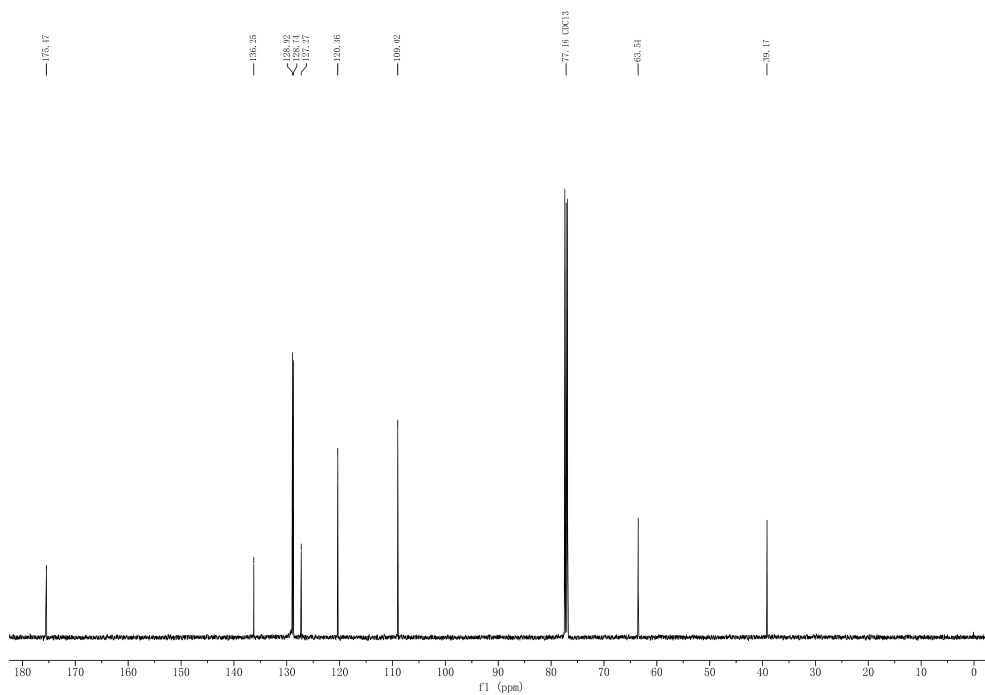

DMTHF, 0% CA, 90 °C, 15 min for crude  $^{13}\text{C}$  NMR of Compound **19** (126 MHz,  $\text{CDCl}_3$ )

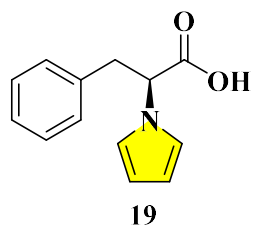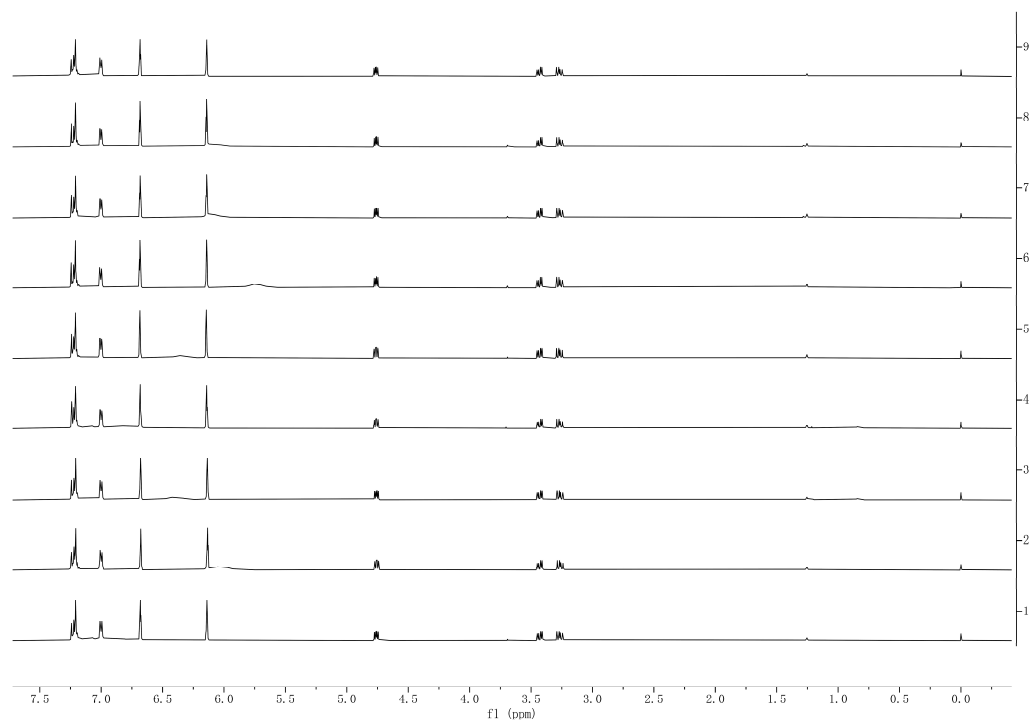

**Fig. S5.** Crude parallel  $^1\text{H}$  NMR spectra for the N-protected products of L-Phenylalanine after simplified centrifugal isolation. Reaction temperature was  $90\text{ }^\circ\text{C}$  for all entries. 0.75% CA, 1 h (Entry 1); 0.75% CA, 30 min (Entry 2); 0.75% CA, 15 min (Entry 3); 0.3% CA, 30 min (Entry 4); 0.1% CA, 30 min (Entry 5); 0.05% CA, 30 min (Entry 6); 0.01% CA, 30 min (Entry 7); 0% CA, 30 min (Entry 8); 0% CA, 15 min (Entry 9).

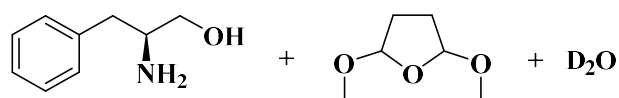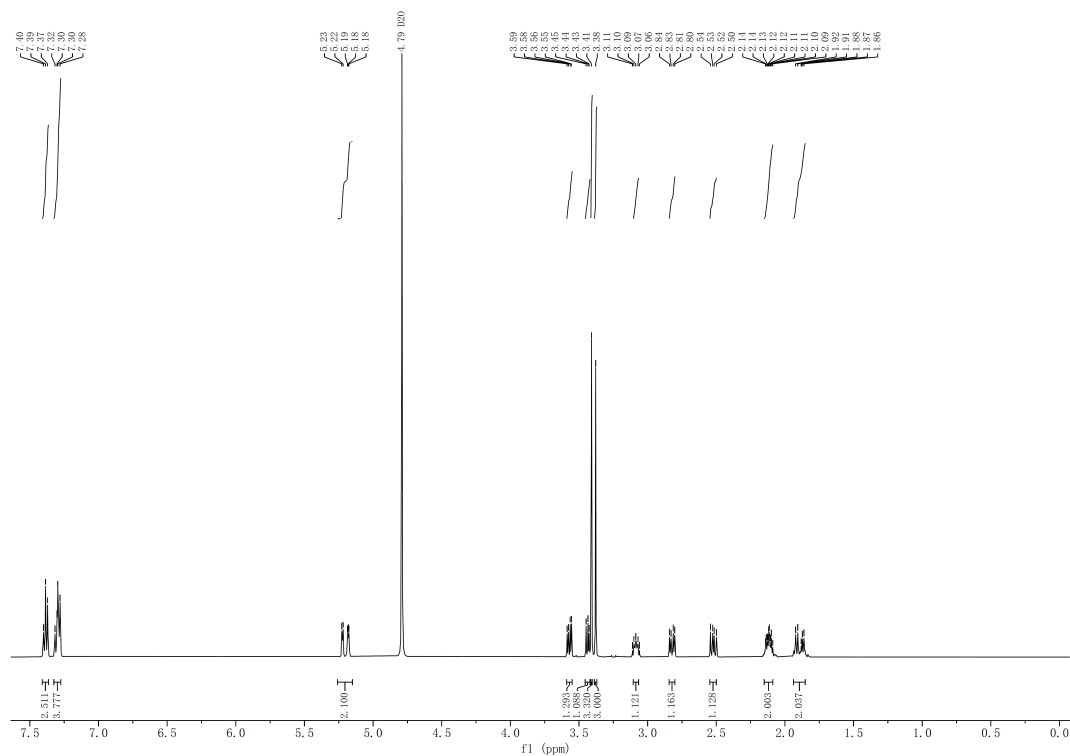

DMTHF, 0% CA, 100 °C, 2 h for  $^1\text{H}$  NMR of crude reactants (500 MHz,  $\text{D}_2\text{O}$ )

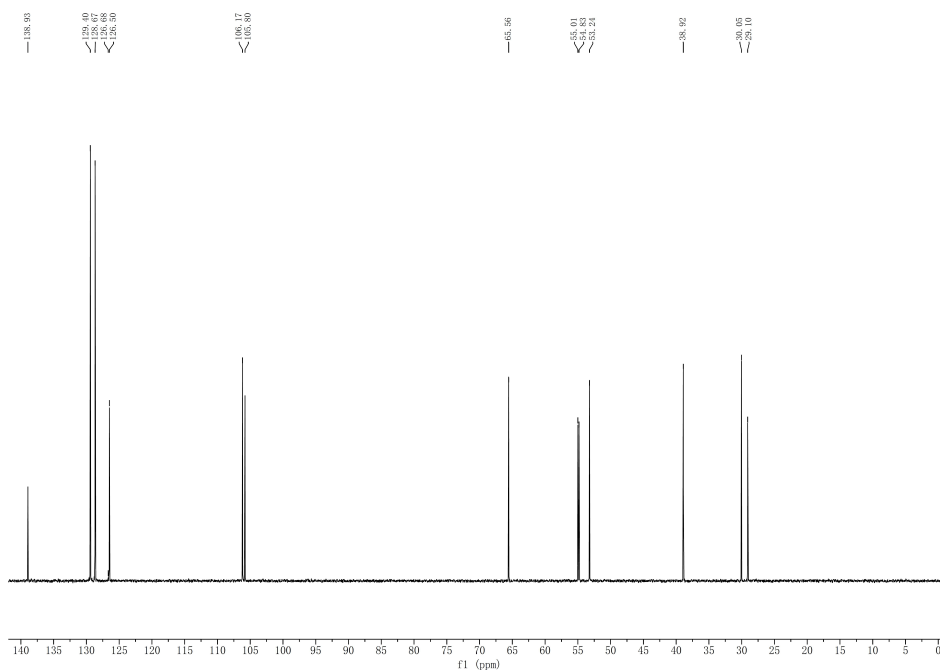

DMTHF, 0% CA, 100 °C, 2 h for  $^{13}\text{C}$  NMR of crude reactants (126 MHz,  $\text{D}_2\text{O}$ )



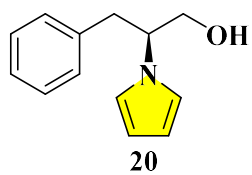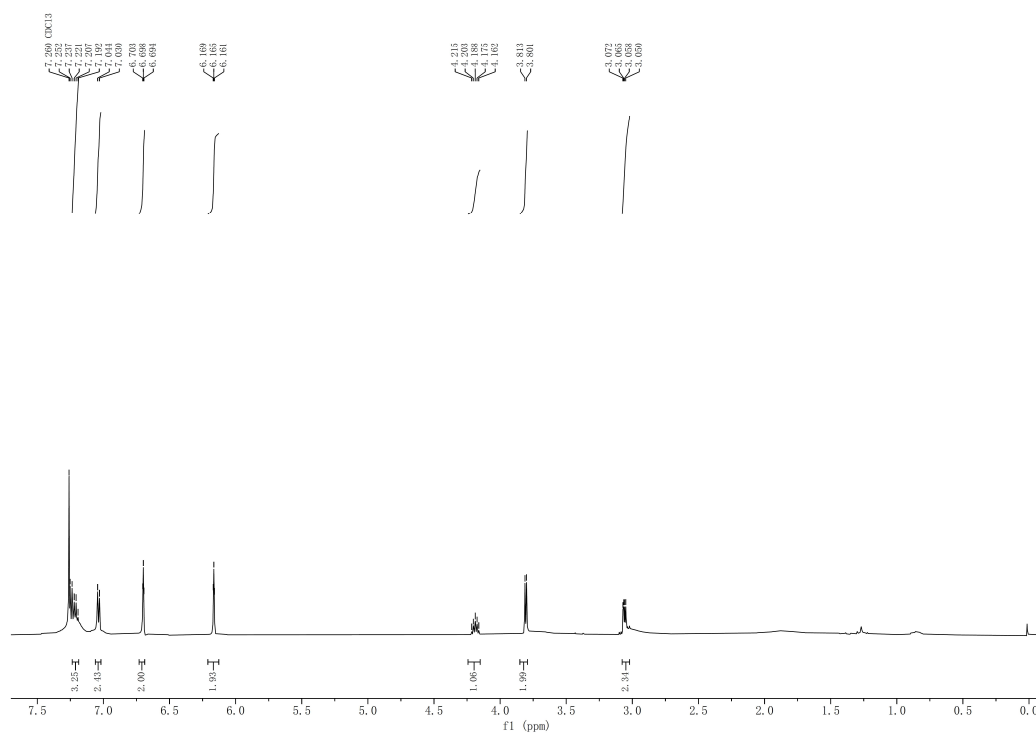

Succinaldehyde, 0% CA, 100 °C, 4 h for crude <sup>1</sup>H NMR of Compound **20** (500 MHz, CDCl<sub>3</sub>)

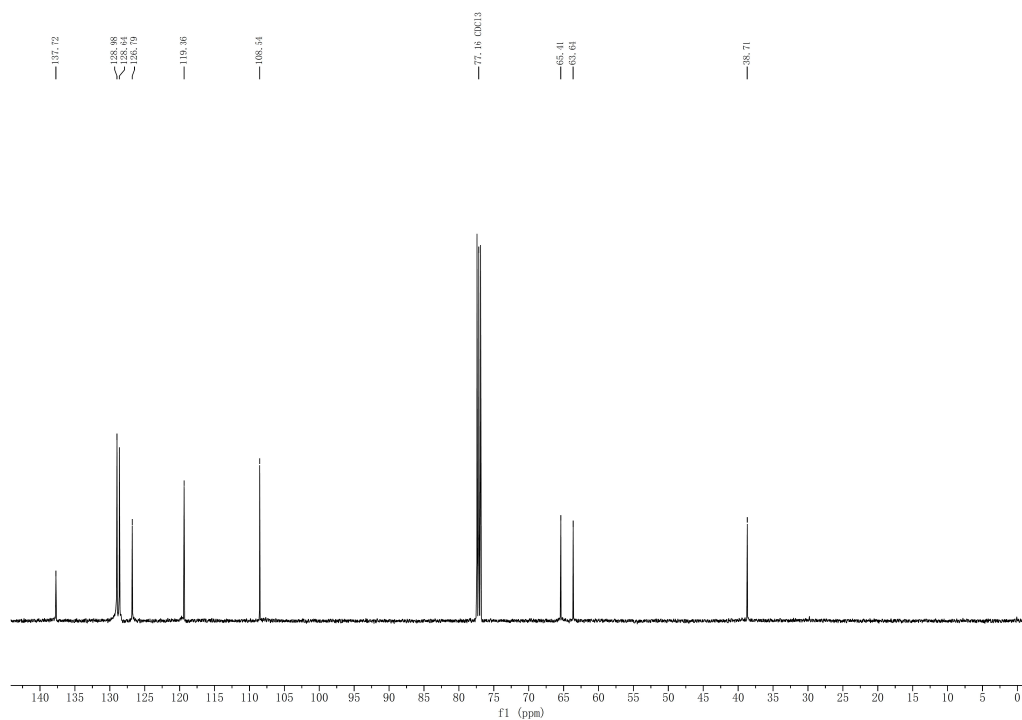

Succinaldehyde, 0% CA, 100 °C, 4 h for crude <sup>13</sup>C NMR of Compound **20** (126 MHz, CDCl<sub>3</sub>)

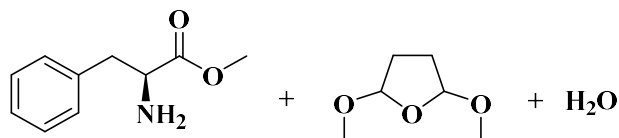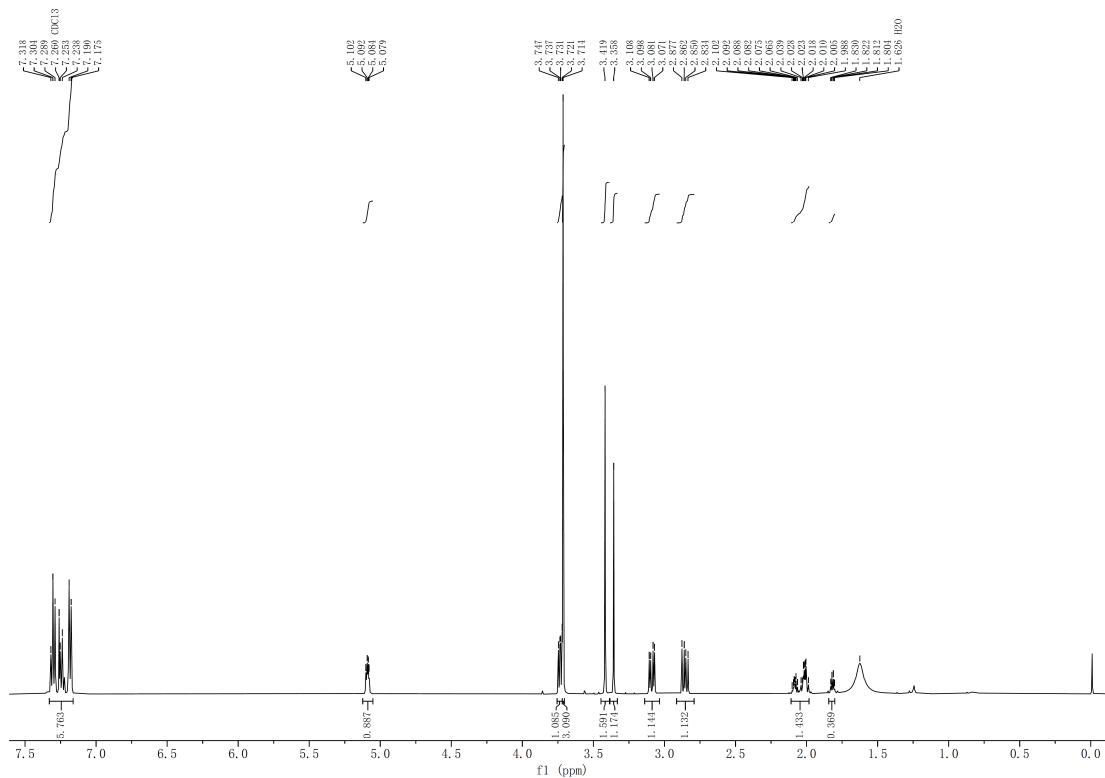

DMTHF, 0% CA, 90 °C, 30 min for <sup>1</sup>H NMR of crude reactants (500 MHz, CDCl<sub>3</sub>)

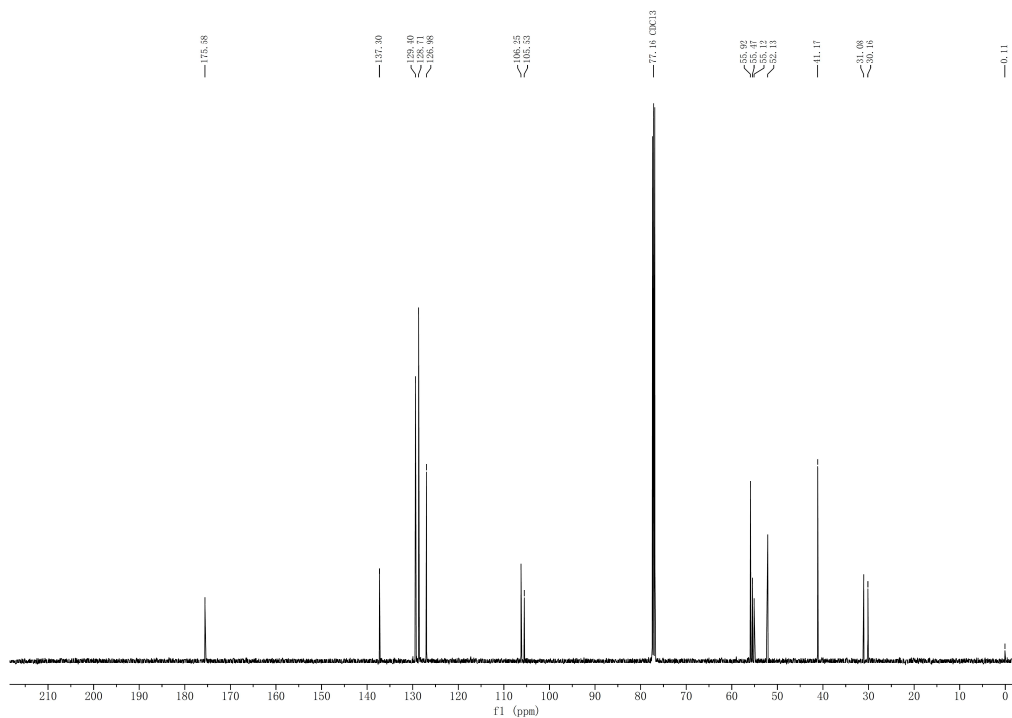

DMTHF, 0% CA, 90 °C, 30 min for <sup>13</sup>C NMR of crude reactants (126 MHz, CDCl<sub>3</sub>)

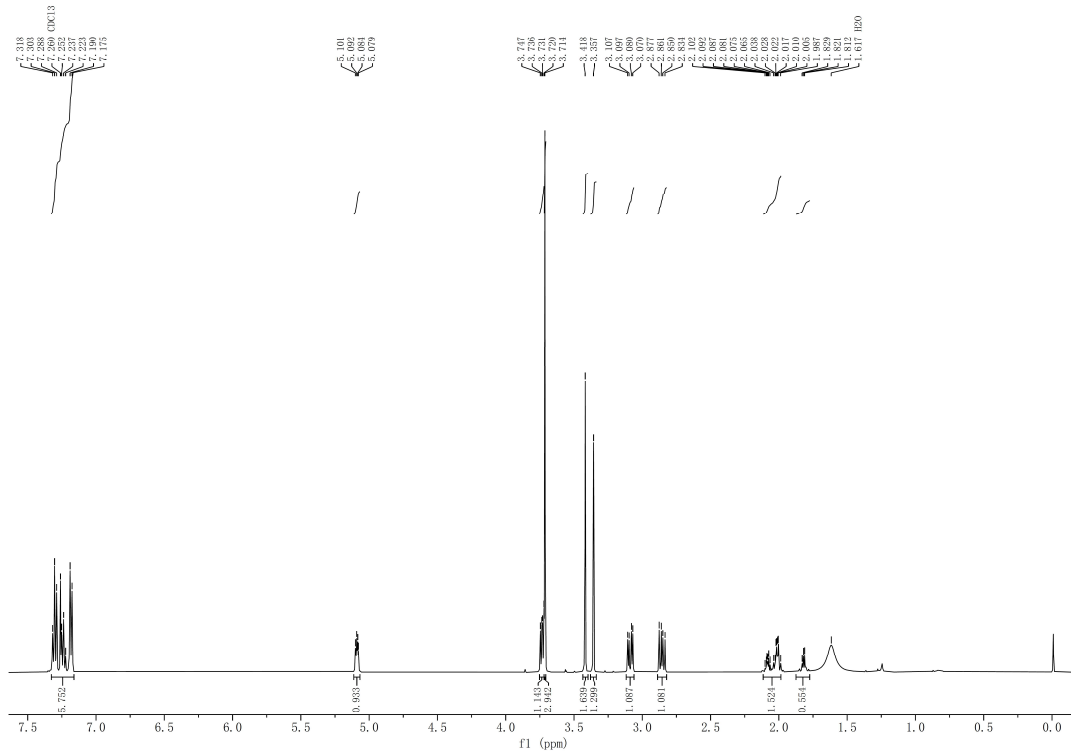

DMTHF, 0.75% CA, 90 °C, 30 min for <sup>1</sup>H NMR of crude reactants (500 MHz, CDCl<sub>3</sub>)

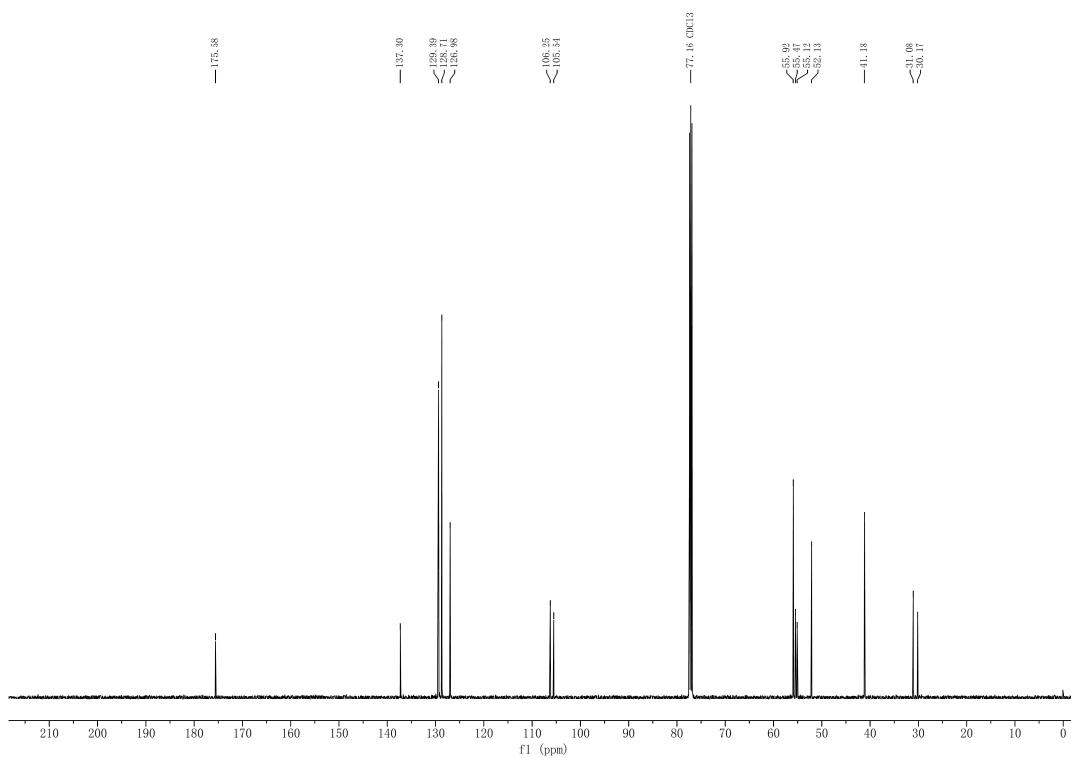

DMTHF, 0.75% CA, 90 °C, 30 min for <sup>13</sup>C NMR of crude reactants (126 MHz, CDCl<sub>3</sub>)

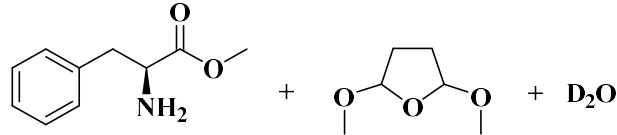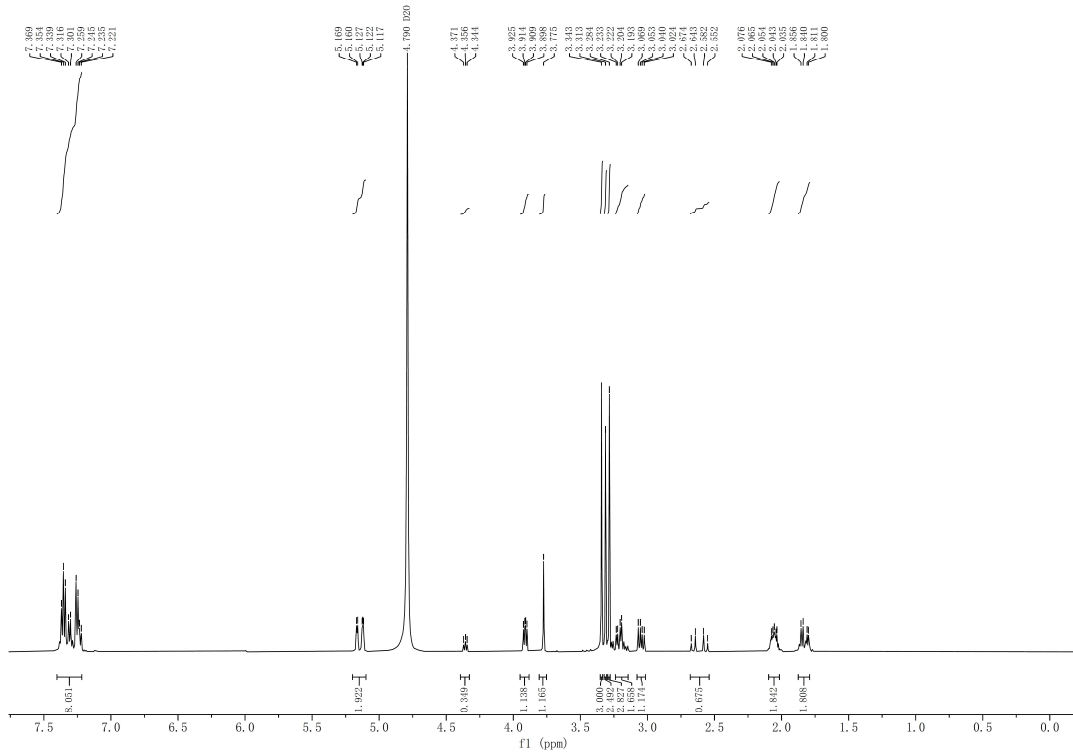

DMTHF, 10% CA, 90 °C, 2 h for <sup>1</sup>H NMR of crude reactants (500 MHz, D<sub>2</sub>O)

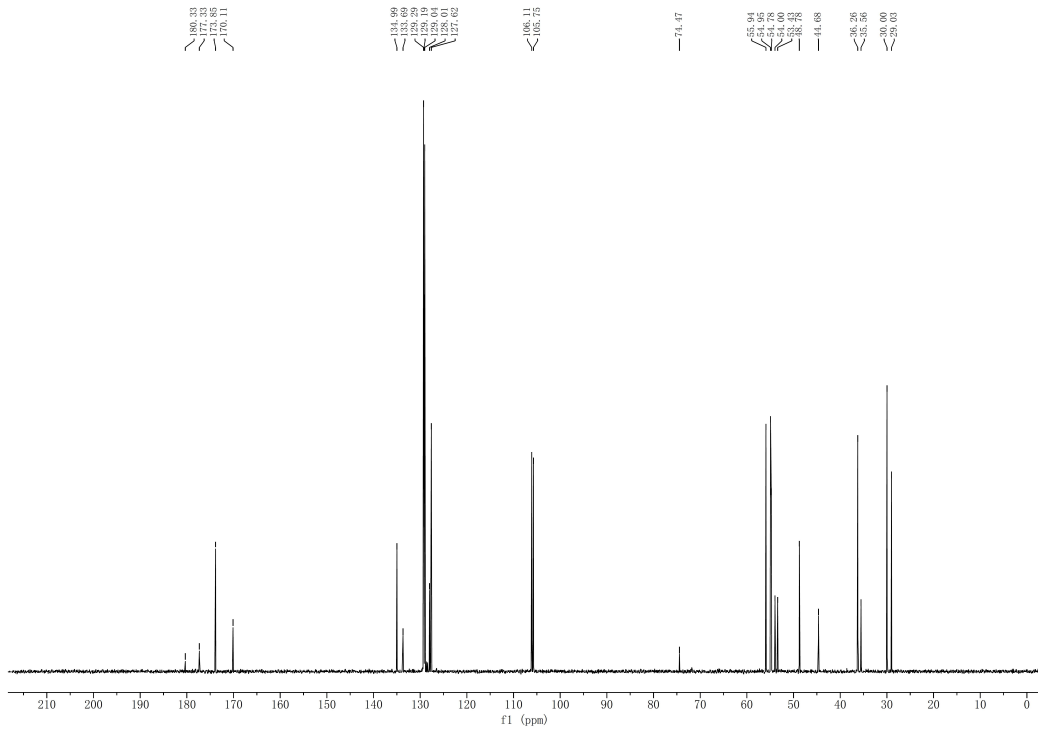

DMTHF, 10% CA, 90 °C, 2 h for <sup>13</sup>C NMR of crude reactants (126 MHz, D<sub>2</sub>O)
